# Supplementary material for: Inhibition of USP14 Deubiquitinating Activity as a Potential Therapy for Tumors with p53 Deficiency
Source: PubMed Central journal article supplement — Mol Ther Oncolytics. 2020 Jan 11;16:147–57. doi: 10.1016/j.omto.2019.12.013 (PMC7005481; doi:10.1016/j.omto.2019.12.013), 2020-01-11
Supplement: mmc1.pdf [file mmc1.pdf]

## Supplemental Information

### Inhibition of USP14 Deubiquitinating

### Activity as a Potential Therapy

### for Tumors with *p53* Deficiency

Yu-Shui Ma, Xiao-Feng Wang, Yun-Jie Zhang, Pei Luo, Hui-Deng Long, Liu Li, Hui-Qiong Yang, Ru-Ting Xie, Cheng-You Jia, Gai-Xia Lu, Zheng-Yan Chang, Jia-Jia Zhang, Shao-Bo Xue, Zhong-Wei Lv, Fei Yu, Qing Xia, and Da Fu

1 **SUPPLEMENTAL INFORMATION**

2

3 **Inhibition of USP14 deubiquitinating activity as a potential therapy for tumors**  
4 **with *p53* deficiency**

5

6 Yu-Shui Ma<sup>1,2\*</sup>, Xiao-Feng Wang<sup>3\*</sup>, Yun-Jie Zhang<sup>3</sup>, Pei Luo<sup>1</sup>, Hui-Deng Long<sup>1</sup>, Liu  
7 Li<sup>1</sup>, Hui-Qiong Yang<sup>1</sup>, Ru-Ting Xie<sup>1</sup>, Cheng-You Jia<sup>2</sup>, Gai-Xia Lu<sup>2</sup>, Zheng-Yan  
8 Chang<sup>1</sup>, Jia-Jia Zhang<sup>2</sup>, Shao-Bo Xue<sup>1</sup>, Zhong-Wei Lv<sup>2</sup>, Fei Yu<sup>2</sup>, Qing Xia<sup>3</sup>, Da Fu<sup>1#</sup>

9

10 Supplemental information contains 3 supplemental figures and legends and online  
11 methods.

12

13 **Supplementary Figure 1**

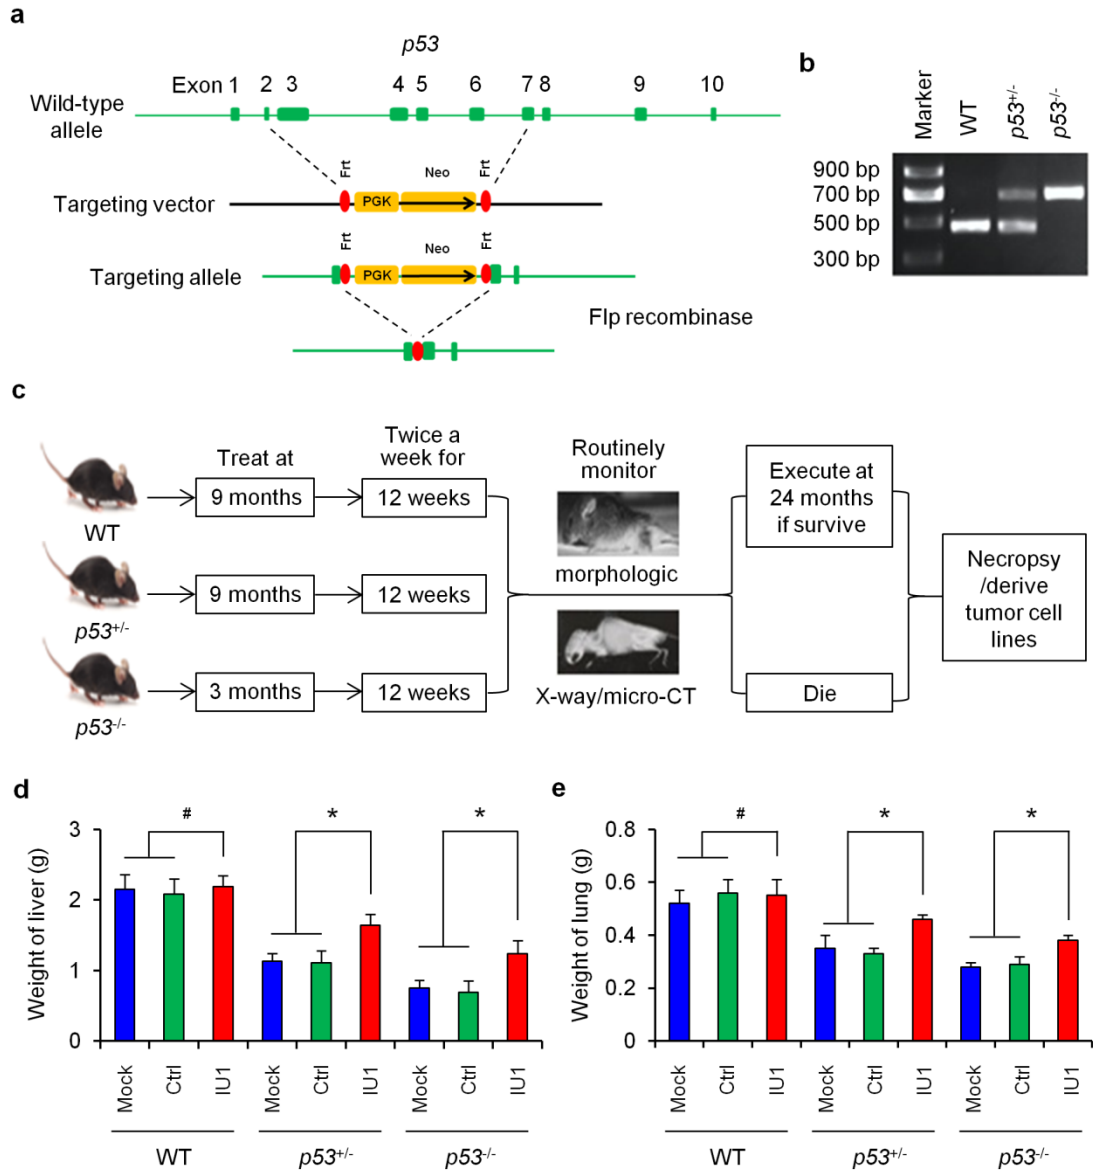

14

15

16 **Supplementary Figure 2**

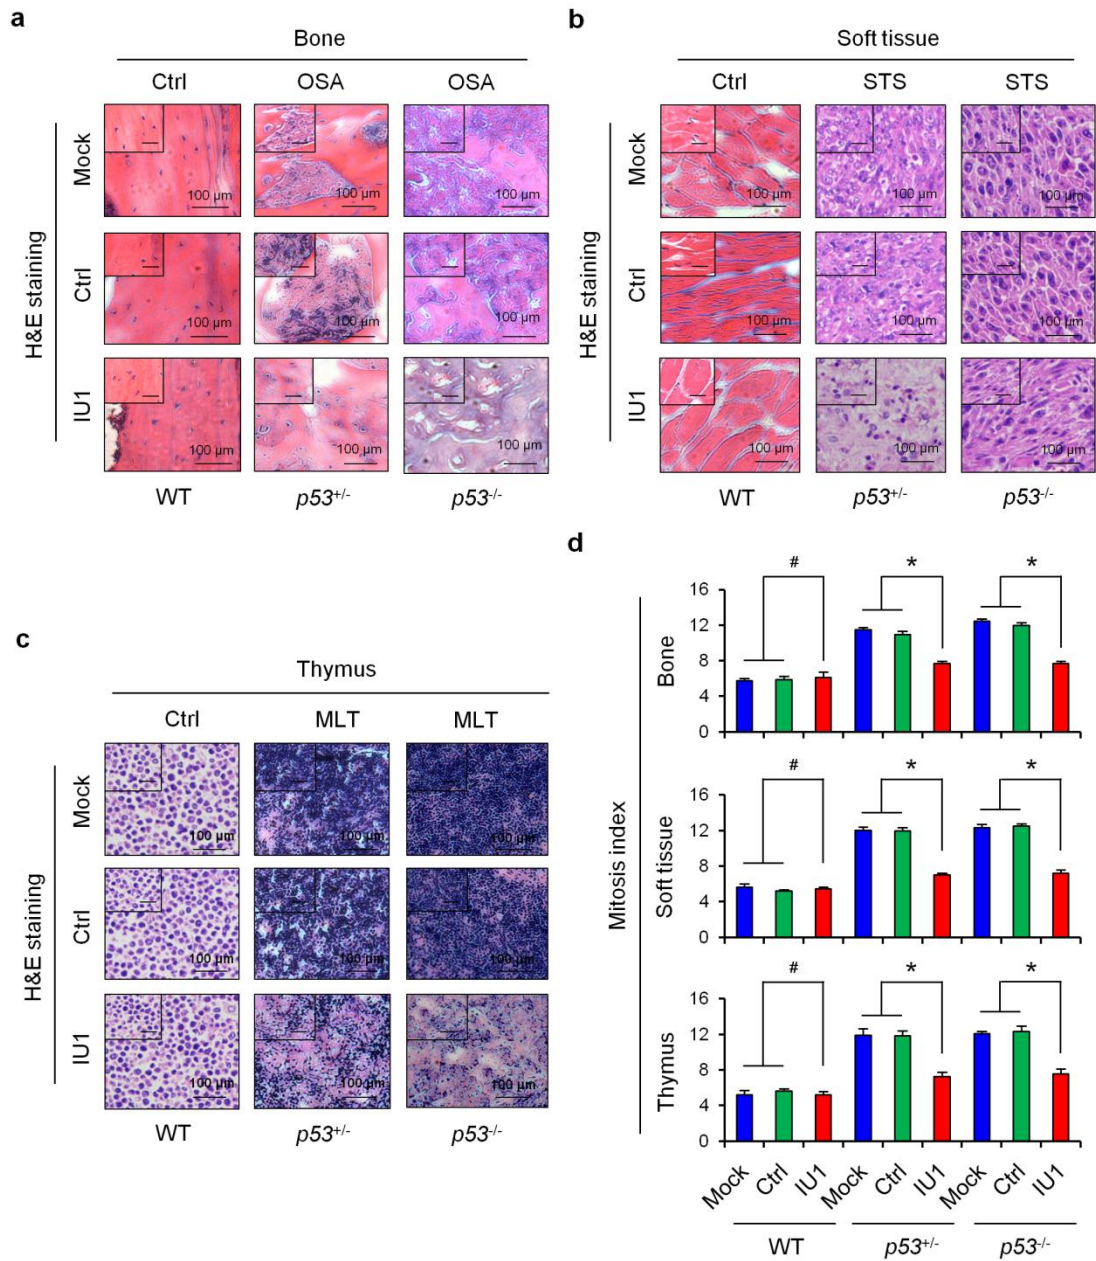

17

18

19 **Supplementary Figure 3**

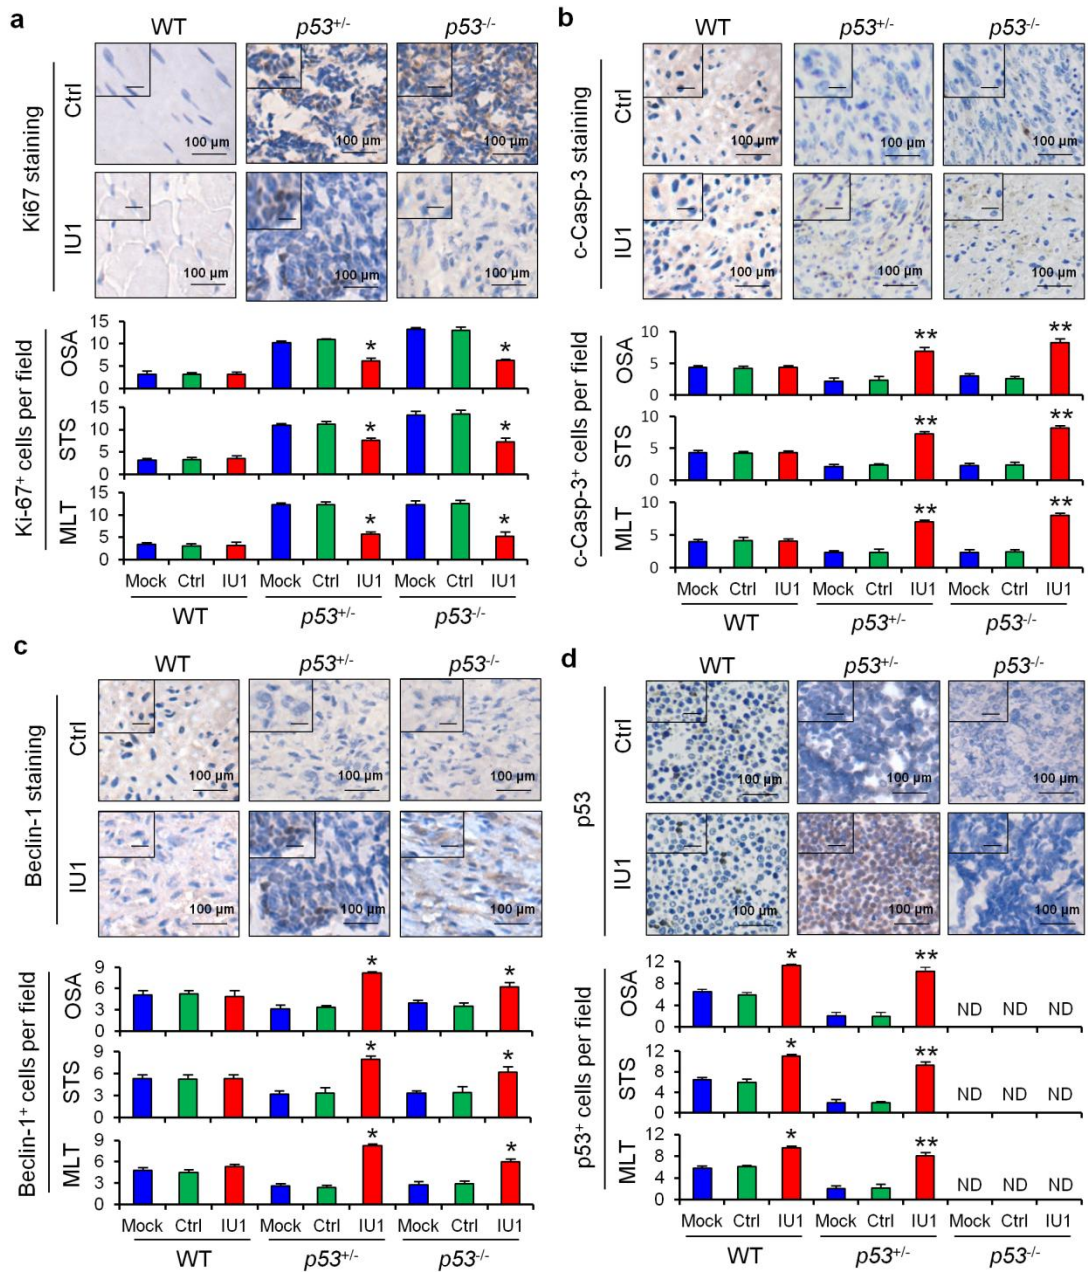

20

21

22 **Supplementary legends**

23 **Supplementary Figure 1. p53 gene targeting and treatment with IU1 and b-AP15.**

24 (a) Scheme for generation of primary tumors with Flp recombinase in FRT-flanked  
25 *p53* mice. Homologous recombination between the p53KO-targeting vector and one  
26 allele of the endogenous p53 gene results in the replacement of p53 coding sequences  
27 between exons 2 and 7 with the neo gene expression cassette and the formation of the  
28 *p53*<sup>Δ</sup> mutant allele. (b) Genotypic analysis of offspring from a *p53* heterozygous cross.  
29 Tail biopsies were collected at weaning and offspring were screened for the *p53*  
30 mutation. (c) Experimental design of generation of primary tumors and treatment with  
31 IU1 for tumors with *p53* deficiency. (d, e) Responses to treatment with IU1 as  
32 assessed by weight of liver (d) and lung (e). Data shown are the means ± SDs.  
33 Statistical analyses were performed with one-way ANOVA (\*  $P < 0.05$  and #  $P > 0.05$   
34 vs. control).

35 **Supplementary Figure 2. H&E staining and mitosis index analysis in WT or**

36 ***p53*-deficient mice.** (a-c) H&E staining analysis of normal or primary tumors in bone  
37 (a), soft tissue (b) and thymus (c) in WT or *p53*-deficient mice with or without  
38 treatment with IU1. (d) The mitosis index analysis in WT or *p53*-deficient mice with  
39 or without treatment with IU1. Data shown are the means ± SDs. Statistical analyses  
40 were performed with one-way ANOVA (\*\*  $P < 0.01$  and #  $P > 0.05$  vs. control).

41 **Supplementary Figure 3. IHC staining analysis for p53, Ki67, c-caspase-3 and**

42 **Beclin-1 in WT or *p53*-deficient mice.** IHC staining analysis and quantitative  
43 analysis for p53 (a), Ki67 (b), c-caspase-3 (c) and Beclin-1 (d) in WT or *p53*-deficient

44 mice with or without treatment with IU1 and b-AP15. Data shown are the means  $\pm$   
45 SDs. Statistical analyses were performed with one-way ANOVA (\*  $P < 0.05$  and \*\*  $P$   
46  $< 0.01$  vs. control). Ctrl, control; MLT, malignant lymphomas of thymus; Mock, mice  
47 without treatment; OSA, osteosarcoma; STS, soft tissue sarcoma; WT, wild type.  
48

49 **ONLINE METHODS**

50 **Animal models and genotyping**

51 All experimental procedures were approved by the Institutional Animal Care and  
52 Use Committee (IACUC) guidelines at Tongji University School of Medicine  
53 (SYDW-19-215).

54 The  $p53^{-/-}$  mice in C57BL/6 background, purchased from Jackson Laboratory, were  
55 crossed with WT mice and the resulting mice were further intercrossed to generate  
56  $p53^{+/-}$  mice [1]. Genomic DNA from tail biopsies was genotyped by PCR. The  $p53^{+/-}$   
57 mice and  $p53^{-/-}$  mice were used to observe the spontaneous tumor formation,  
58 treatment of IU1 and primary cell cultures. IU1 (5mg/kg, 1%DMSO + 30%PEG300 +  
59 1%Tween80 + ddH<sub>2</sub>O) was given i.p. twice a week for the number of days indicated.  
60 IU1 was purchased from SelleckChem. Mice without any treatment were used as the  
61 mock, and mice treated with vehicle (1%DMSO + 30%PEG300 + 1%Tween80 +  
62 ddH<sub>2</sub>O) were used as the control.

63 All mice were monitored by X-ray, MRI or micro-CT diagnosis for tumor  
64 phenotypes weekly up to the age of 24 months before all of the surviving animals  
65 were sacrificed. The body and main organs (liver and lung) weight measurements  
66 were performed to collect the data when the mouse was died or up to the age of 24  
67 months before all of the surviving animals were sacrificed. Moribund animals or those  
68 mice developing obvious tumors before this end point were also sacrificed and  
69 necropsied. The tumors were placed in 10% neutral buffered formalin for further  
70 histopathological analysis. Tumor histological type was independently confirmed by



71 two experienced pathologists and tumor volume was calculated using the following  
72 formula: volume = length × width<sup>2</sup> × 0.52.

73 All cell mitotic figures within each tumor were counted and are presented as  
74 number of mitotic figures per unit area (cm<sup>2</sup>). All experimental procedures were  
75 approved by the Institutional Animal Care and Use Committee (IACUC) guidelines at  
76 Tongji University School of Medicine (SYDW-19-215).

### 77 **Cell lines**

78 Human osteosarcoma epithelial cell lines U2OS, mouse B lymphoma cell  
79 WEH1-231 and human HEK293T cell lines were purchased from the Cell Bank of the  
80 Chinese Academy of Sciences (Shanghai, China), and cultured in DMEM media  
81 (Invitrogen, Carlsbad, USA) and supplemented with 10 % (v/v) fetal bovine serum  
82 (FBS), 100 U/ml penicillin, and 100 mg/ml streptomycin. Cell lines were routinely  
83 tested for mycoplasma contamination, and have been authenticated with short-tandem  
84 repeat analysis. Derivation of murine thymic lymphoma T-cell lines and primary  
85 cultured osteosarcoma cells lines were obtained from *p53*<sup>-/-</sup> mice and cultured as  
86 described previously [2, 3]. Cell culture was conducted at 37 °C in a humidified 5%  
87 CO<sub>2</sub> incubator.

### 88 **Cell viability assay**

89 MTS assay (CellTiter 96 Aqueous One Solution reagent) was used to test cell  
90 viability as we previously reported [4]. In brief, exponentially growing cells were  
91 seeded at 2500 cells/well in a 96-well plate. After incubation for 24 h, U2OS,  
92 WEH1-231, PCOC or MTLTC cells were treated with IU1, USP14, shUSP14, COPS5

93 and/or shCOPS5 plasmids, followed by continuous incubation for 24, 48 or 72 h.  
94 MTS reagent (20  $\mu$ l) was directly added to each well and the incubation was  
95 continued for additional 3 h. The absorbance of optical density was measured with a  
96 microplate reader (Sunrise, Tecan, Mannedorf, Switzerland) at wavelength 490 nm.  
97 Cell viability was calculated by the following formula: cell viability (%) = (average  
98 absorbance of treated group – average absorbance of blank) / (average absorbance of  
99 untreated group – average absorbance of blank)  $\times$  100%.

#### 100 **Flow cytometry (FCM) analysis**

101 Cell apoptosis was determined by flow cytometry analysis [5]. Cells were collected,  
102 washed with cold phosphate-buffered saline, fixed in cold 70% ethanol, treated with  
103 DNase-free RNase (100  $\mu$ g/mL, Cat. No. RB473; Sangon Biotech Co., Ltd., Shanghai,  
104 China), and stained with 50  $\mu$ g/mL propidium iodide (Cat. No. P1112; Sangon  
105 Biotech) and the Annexin V-APC/7-AAD Kit (Cat. KGA-1025; KeyGEN Biotech,  
106 Nanjing, China). The cells were analysed using a Gallios flow cytometer (Beckman  
107 Coulter) to quantify the proportion of cells in apoptosis status. To analyze the cell  
108 cycle distribution, cells were treated with IU1 for the previously indicated time  
109 periods and the harvested cells were fixed with 75% ethanol overnight. Next, the cells  
110 were incubated with a 500  $\mu$ L hypotonic solution containing 50  $\mu$ g/mL PI, 0.1%  
111 sodium citrate, and 0.1% Triton X-100 for 15 min in the dark, and then analyzed by  
112 FCM (Becton Dickinson, USA). Data were analyzed using Modfit 2.8 software [6].

#### 113 **Plasmid construction and transfection**

114 Overexpression of USP14, Flag-USP14, COPS5 or HA-COPS5 was performed

115 using the pMSCV retroviral plasmid. All constructs were confirmed by PCR and  
116 Sanger sequencing. The plasmids were transiently transfected into target cells with  
117 Lipofectamin 2000 (Life Technologies, Gaithersburg, MD).

118 To generate stable cell lines with specific gene overexpression or knockdown, the  
119 plasmids were packaged into retroviruses with the amphotropic Phoenix packaging  
120 cell line and infected into target cells, followed by puromycin/hygromycin selection  
121 of infected cells. USP14 or COPS5-knockdown cell lines were generated using short  
122 hairpin RNAs and retroviral transduction. Short hairpinRNA (shRNA) a random  
123 sequence was set up as a control.

#### 124 **Western blot**

125 Total proteins were extracted from cells following the standard protocol [7]. Protein  
126 concentration was measured using the BCA protein assay kit (Thermo Scientific;  
127 23225). The primary antibodies used in this study were as follows: GAPDH (cat.  
128 ab8245), USP14 (cat. ab137432), COPS5 (cat. ab210538), p27 (cat. ab32034), DcR2  
129 (cat. ab2019), CDC25C (cat. ab32444), CDC2 (cat. ab18), cleaved caspase-3 (cat.  
130 ab2302), pro-caspase-3 (cat. ab13585), BAX (cat. ab32503), BCL-2 (cat. ab32124),  
131 Cyclin E1 (cat. ab33911), E2F7 (cat. ab56022), p15 (cat. ab53034), PARP1 (cat.  
132 ab32064), HA (cat. ab18181), Cyclin B1 (cat. ab72) and p53 (cat. ab26) from Abcam,  
133 AP-1 (cat. 9165), p21 (cat. 2947), p16 (cat. 92803) and Beclin-1 (cat. 3495) from Cell  
134 Signaling and Cyclin D1 (cat. 554181) from BD. The goat anti-rabbit IgG (Merck)  
135 and goat anti-mouse IgG (Merck) antibodies were used for western blot analyses.  
136 Antibody dilutions were 1:1,000 for primary antibodies and 1:5,000 for secondary

137 antibodies in western blotting. Data are representation of 3-4 independent  
138 experiments.

### 139 **Histology and immunohistochemistry (IHC) analysis**

140 Standard IHC and H&E staining were used to evaluate protein expression levels in  
141 tumor samples. Tissues from mice were flushed and fixed in 4% formaldehyde in PBS  
142 for 24 h. Samples were then dehydrated and embedded in paraffin, sectioned at 5  $\mu$ M  
143 and processed for H&E staining. The primary antibodies were: Ki-67 (Abcam,  
144 ab156956), Beclin-1 (Abcam, ab62557), p53 (Abcam, ab1101), COPS5 (Abcam,  
145 ab12323), USP14 (Cell Signaling, 11931), and cleaved-caspase3 (Cell Signaling,  
146 9661). Staining was visualized with ABC Kit Vectastain Elite (Vector) or TSA kit  
147 (Invitrogen). Serial sections were stained in parallel with the primary antibody  
148 replaced by PBS as controls.

### 149 **Immunoprecipitation and immunoblotting**

150 For immunoprecipitation assays, cells were pretreated MG132 or IU1 for the  
151 previously indicated time periods, and lysed with HEPES lysis buffer (20 mM HEPES,  
152 pH 7.2, 50 mM NaCl, 0.5% NP-40, 1 mM NaF and 1 mM dithiothreitol)  
153 supplemented with protease-inhibitor cocktail (Roche). Immunoprecipitations were  
154 performed using the indicated primary antibody and protein A/G agarose beads  
155 (Roche) at 4 °C. Both lysates and immunoprecipitates were examined using anti-Ub,  
156 anti-Flag or anti-HA primary antibodies (Cell Signaling) and the related secondary  
157 antibody followed by detection with the chemiluminescence substrate (Millipore). For  
158 immunoblotting, total proteins were extracted from cells following the standard

159 protocol. Cytomembrane free lysate were separated from cells by Native Membrane  
160 Protein Extraction Kit (Millipore; 444810). Nuclear and cytoplasmic proteins were  
161 separated by Cytoplasmic & Nuclear Extraction Kit (Invent; sc-003) [8]. Protein  
162 concentration was measured using the BCA protein assay kit (Thermo Scientific;  
163 23225).

#### 164 **Mass spectrometry**

165 Pellets of U2OS cell expressing Flag-UCH37 from two 150-mm plates were lysed  
166 in 50 mM HEPES-KOH (pH8.0), 100 mM KCl, 2 mM EDTA, 0.1% NP-40, 10%  
167 glycerol and affinity-purified using Flag-M2 magnetic beads (Sigma-Aldrich).  
168 Subsequently, digestion with trypsin (Worthington, Columbus) was performed  
169 on-beads. For liquid chromatography-tandem mass spectrometry analysis, peptides  
170 were reconstituted in 5% formic acid and loaded onto a 12–15-cm fused silica column  
171 with pulled tip packed with C18 reversed-phase material. Peptides were analysed  
172 using an LTQ-Orbitrap Velos (Thermo Scientific) or a 6600 Triple TOF (AB SCIEX,  
173 Framingham) coupled to an Eksigent NanoLC-Ultra HPLC system and a  
174 nano-electrospray ion source (Proxeon Biosystems, Thermo Fisher Scientific).  
175 Peptides were eluted from the column using a 90–100-min gradient of acetonitrile in  
176 0.1% formic acid. The lyophilized peptide mixture was re-suspended in water with  
177 0.1% formic acid (v/v) and its content was estimated by UV light spectral density at  
178 280 nm, then 3 µg of the digest peptides were analyzed by nano-liquid  
179 chromatography-tandem mass spectrometry (LC-MS/MS) on LTQ Orbitrap Velos Pro  
180 mass spectrometer [9-11]. Raw data was processed by Maxquant software (1.3) and

181 then used for database and spectral library searching using Andromeda peptide search  
182 engines. The Maxquant peptide and protein quantification results files were imported  
183 into Perseus software (version 1.5.1.6) for further analysis [12].

#### 184 **RNA extraction and quantitative PCR (qPCR)**

185 RNA was extracted using TRIzol (ThermoFisher Scientific) following the  
186 manufacture's protocol, and then subjected to cDNA synthesis using iScript kit  
187 (Bio-rad). RNA concentration was measured using a NanoDrop2000  
188 spectrophotometer (Thermo Fisher Scientific, Waltham, MA, USA). Electrophoresis  
189 on 1.5% denaturing agarose gels was performed to evaluate the quality of all RNA  
190 specimens. The cDNA was obtained from total RNA by reverse transcription, and the  
191 final RNA concentration used in the quantitative PCR reaction was 10 ng, Real-time  
192 PCR was performed using the iTag universal SYBR Green kit (Bio-rad) and  
193 subsequently analyzed in a CFX Connect system (Bio-rad). Sequences of PCR  
194 primers are as following: GAPDH: Forward, 5'-ACCCAGAAGACTGTGGATGG-3',  
195 Reverse, 5'-TTCTAGACGGCAGGTCAGGT-3'; USP14: Forward,  
196 5'-GGCGTGTGGAGATGTATAAC-3, Reverse,  
197 5'-CAGCTCAGCACTATCCAGAC-3' and COPS5, Forward,  
198 5'-GTCATGTGGTTGCTGTGATG-3', Reverse,  
199 5'-AGGTGACGTGACTGAATGAG-3'. GAPDH were used as the endogenous  
200 controls, and the  $2^{-\Delta\Delta CT}$  method was used to analyze expression levels [13].

#### 201 **Imaging**

202 In the animal studies, we used the dual tube/detector micro-CT system that has

203 been described in detail elsewhere [14]. The x-ray parameters were 80 kVp, 160 mA,  
204 and 10ms per exposure, and the radiation dose associated with the micro-CT scan was  
205 16 cGy. MRI experiments were performed on a Bruker BioSpec 7.0 Tesla 30 cm clear  
206 bore USR (Ultra Shielded Refrigerated) horizontal bore Superconducting Magnet  
207 System [15]. The Bruker-made 23-mm ID birdcage volume radiofrequency coil was  
208 used for both radiofrequency excitation and receiving. Animals were anesthetized  
209 throughout the imaging procedure through the inhalation of a mixture of 1.5%  
210 isoflurane into medically supplied air.

### 211 **Statistical analysis**

212 Measurement data was expressed as mean  $\pm$  S.D. (standard deviation). Categorical  
213 data were reported as numbers and percentages. Analysis of two samples was  
214 performed with unpaired two-tailed Student t test for equal variance, or t test with  
215 Welch's correction for heterogeneity of variance. The chi-square test was used to  
216 evaluate the difference among different groups. Univariate survival analysis of overall  
217 survival was carried out using the Kaplan-Meier method. Spearman's correlation  
218 coefficient was used to test the relationship of two independent groups. All  
219 calculations were performed with the Prism 6.0 GraphPad or SPSS 20.0 software  
220 program (SPSS Inc, Chicago, IL, USA). The level of significance was set as  $P < 0.05$ .

221

222 **Supplementary References**

- 223 [1] Jacks T, Remington L, Williams BO, Schmitt EM, Halachmi S, Bronson RT, *et*  
224 *al.* Tumor spectrum analysis in p53-mutant mice. *Curr Biol.* 1994, 4(1): 1-7.
- 225 [2] Jinadasa R, Balmus G, Gerwitz L, Roden J, Weiss R, Duhamel G. Derivation of  
226 thymic lymphoma T-cell lines from *Atm*<sup>-/-</sup> and *p53*<sup>-/-</sup> mice. *J Vis Exp.* 2011,  
227 (50): 2598.
- 228 [3] Ma O, Cai WW, Zender L, Dayaram T, Shen J, Herron AJ, *et al.* MMP13, Birc2  
229 (cIAP1), and Birc3 (cIAP2), amplified on chromosome 9, collaborate with p53  
230 deficiency in mouse osteosarcoma progression. *Cancer Res.* 2009, 69(6):  
231 2559-67.
- 232 [4] Liao Y, Liu N, Hua X, Cai J, Xia X, Wang X, *et al.* Proteasome-associated  
233 deubiquitinase ubiquitin-specific protease 14 regulates prostate cancer  
234 proliferation by deubiquitinating and stabilizing androgen receptor. *Cell Death*  
235 *Dis.* 2017, 8(2): e2585.
- 236 [5] Ma YS, Yu F, Zhong XM, Lu GX, Cong XL, Xue SB, *et al.* miR-30 Family  
237 Reduction Maintains Self-Renewal and Promotes Tumorigenesis in  
238 NSCLC-Initiating Cells by Targeting Oncogene TM4SF1. *Mol Ther.* 2018,  
239 S1525-0016(18): 30447-7.
- 240 [6] Ma YS, Huang T, Zhong XM, Zhang HW, Cong XL, Xu H, *et al.* Proteogenomic  
241 characterization and comprehensive integrative genomic analysis of human  
242 colorectal cancer liver metastasis. *Mol Cancer.* 2018, 17(1): 139.
- 243 [7] Ma YS, Lv ZW, Yu F, Chang ZY, Cong XL, Zhong XM, *et al.* MiRNA-302a/d



244 inhibits the self-renewal capability and cell cycle entry of liver cancer stem cells  
245 by targeting the E2F7/AKT axis. *J Exp Clin Cancer Res.* 2018, 37(1): 252.

246 [8] Choi YS, Hoon Jeong J, Min HK, Jung HJ, Hwang D, Lee SW, *et al.* Shot-gun  
247 proteomic analysis of mitochondrial D-loop DNA binding proteins: identification  
248 of mitochondrial histones. *Mol Biosyst.* 2011, 7(5): 1523-36.

249 [9] Yu Z, Liu N, Wang Y, Li X, Wang X. Identification of neuroglobin-interacting  
250 proteins using yeast two-hybrid screening. *Neuroscience.* 2012, 200: 99-105.

251 [10] Tian XP, Jin XH, Li M, Huang WJ, Xie D, Zhang JX. The depletion of PinX1  
252 involved in the tumorigenesis of non-small cell lung cancer promotes cell  
253 proliferation via p15/cyclin D1 pathway. *Mol Cancer.* 2017, 16(1): 74.

254 [11] Luo P, Lu G, Fan LL, Zhong X, Yang H, Xie R, *et al.* Dysregulation of  
255 TMPRSS3 and TNFRSF11B correlates with tumorigenesis and poor prognosis in  
256 patients with breast cancer. *Oncol Rep.* 2017, 37(4): 2057-2062.

257 [12] Sun X, Zhang H, Luo L, Zhong K, Ma Y, Fan L, *et al.* Comparative proteomic  
258 profiling identifies potential prognostic factors for human clear cell renal cell  
259 carcinoma. *Oncol Rep.* 2016, 36(6): 3131-3138.

260 [13] Livak KJ, Schmittgen TD. Analysis of relative gene expression data using  
261 real-time quantitative PCR and the  $2^{-\Delta\Delta Ct}$  method. *Methods*, 2001. 25(4):  
262 402-408.

263 [14] Badea CT, Johnston S, Johnson B, Lin M, Hedlund LW, Johnson GA. A dual  
264 micro-CT system for small animal imaging. *Proc SPIE.* 2018, 6913: 691342.

265 [15] Ni J, Ramkissoon SH, Xie S, Goel S, Stover DG, Guo H, *et al.* Combination

266 inhibition of PI3K and mTORC1 yields durable remissions in orthotopic  
267 patient-derived xenografts of HER2-positive breast cancer brain metastases. Nat  
268 Med. 2016, 22(7): 723–726.
