# Supplementary material for: Inhibition of USP14 Deubiquitinating Activity as a Potential Therapy for Tumors with p53 Deficiency
Source: PubMed Central journal article supplement — Mol Ther Oncolytics. 2020 Jan 11;16:147–57. doi: 10.1016/j.omto.2019.12.013 (PMC7005481; doi:10.1016/j.omto.2019.12.013), 2020-01-11
Supplement: mmc2.pdf [file mmc2.pdf]

# Inhibition of USP14 Deubiquitinating Activity as a Potential Therapy for Tumors with *p53* Deficiency

Yu-Shui Ma,<sup>1,2,4</sup> Xiao-Feng Wang,<sup>3,4</sup> Yun-Jie Zhang,<sup>3</sup> Pei Luo,<sup>1</sup> Hui-Deng Long,<sup>1</sup> Liu Li,<sup>1</sup> Hui-Qiong Yang,<sup>1</sup> Ru-Ting Xie,<sup>1</sup> Cheng-You Jia,<sup>2</sup> Gai-Xia Lu,<sup>2</sup> Zheng-Yan Chang,<sup>1</sup> Jia-Jia Zhang,<sup>2</sup> Shao-Bo Xue,<sup>1</sup> Zhong-Wei Lv,<sup>2</sup> Fei Yu,<sup>2</sup> Qing Xia,<sup>3</sup> and Da Fu<sup>1</sup>

<sup>1</sup>Central Laboratory for Medical Research, Shanghai Tenth People's Hospital, Tongji University School of Medicine, Shanghai 200072, China; <sup>2</sup>Department of Nuclear Medicine, Shanghai Tenth People's Hospital, Tongji University School of Medicine, Shanghai 200072, China; <sup>3</sup>Department of Orthopedics, Zhongshan Hospital, Fudan University, Shanghai 200032, China

**Functional elimination of p53 is a common feature of a large percentage of human malignancies. Here, we report the development of a pharmacological strategy aimed at restoring p53 function and its use for targeted therapy in p53-deficient mice. Specific inhibition of deubiquitinases ubiquitin-specific peptidase 14 (USP14) resulted in durable tumor regressions of autochthonous lymphomas and sarcomas in p53-deficient mice without affecting normal tissues, and therapeutic response was correlated with an increase in the ubiquitination of constitutive photomorphogenesis 9 (COP9) signalosome subunit 5 (COPS5), a key negative regulatory effector for p53. Inhibition of USP14 resulted in durable tumor regression through COPS5 deubiquitination and a p53-dependent and -independent regulation mechanism by USP14. This series highlights the utility of proteasome deubiquitinating activity inhibition as a novel treatment paradigm for p53-deficient cancers. In addition, it provides preliminary evidence that inhibition of USP14 resulted in durable tumor regression through COPS5 deubiquitination and p53-dependent and -independent regulation mechanism by USP14. These findings suggest that the deubiquitinating activity of the 19S regulatory particle is a new anticancer drug target for patients with p53 deficiency.**

## INTRODUCTION

Wild-type p53 protein is critical for cell function and maintaining integrity of the genome, which suppresses cancer in humans and rodents.<sup>1</sup> This reduction in p53 protein, a common feature of a large percentage of human malignancies, results in deficiencies in cell-cycle check-point control and induction of apoptosis.<sup>2</sup> Mutational inactivation of the p53 gene is also detected in more than 50% of human cancers, in which cancer cells are more resistant to current cancer therapies due to lack of p53-mediated apoptosis.<sup>3</sup>

Extensive studies have been conducted to identify small molecules that manipulate p53, including restoration of mutant p53 to wild-type, disruption of murine double minute-2 (Mdm2)-p53 binding

to prevent p53 degradation, and an increase in p53 level.<sup>4</sup> However, it is not known whether sustained inhibition of proteasome deubiquitinating activity to prevent p53 ubiquitination degradation is required for tumor regression.

To explore this issue, in this study, we utilized p53 knockout mice,<sup>5</sup> in which targeted germline disruption of the p53 gene results in the absence of p53 in all tissues of the mouse throughout development and in adulthood to develop therapeutic strategies for tumors with p53 deficiency (Figures S1A and S1B). Our results suggest that inhibition of 19S proteasome deubiquitinating activity could provide a general strategy for preventing p53 deficiency in a wide range of malignancies through the constitutive photomorphogenesis 9 (COP9) signalosome subunit 5 (COPS5) deubiquitination and p53-dependent and -independent regulation mechanism by ubiquitin-specific peptidase 14 (USP14).

## RESULTS

### Inhibition of Proteasome Deubiquitinating Activity Leads to Tumor Regression *In Vivo*

Adult *p53*<sup>-/-</sup> mice succumb to cancer death mostly by developing lymphomas at an early age (between 4 and 6 months), and heterozygous *p53*<sup>+/-</sup> mice have an increased lifespan and in addition to malignant lymphomas of thymus (MLT), also develop sarcomas (including osteosarcoma [OSA] and soft tissue sarcoma [STS]) and to a much lesser extent, carcinomas (Figure 1A).

We previously found that an USP14 inhibitor IU1 induced tumor cell apoptosis and inhibits tumor growth *in vitro* (unpublished data).

Received 13 June 2019; accepted 23 December 2019;  
<https://doi.org/10.1016/j.omto.2019.12.013>.

<sup>4</sup>These authors contributed equally to this work.

**Correspondence:** Da Fu, Central Laboratory for Medical Research, Shanghai Tenth People's Hospital, Tongji University School of Medicine, Middle 301 Yanchang Road, Shanghai 200072, China.  
E-mail: [fu800da900@126.com](mailto:fu800da900@126.com)

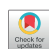

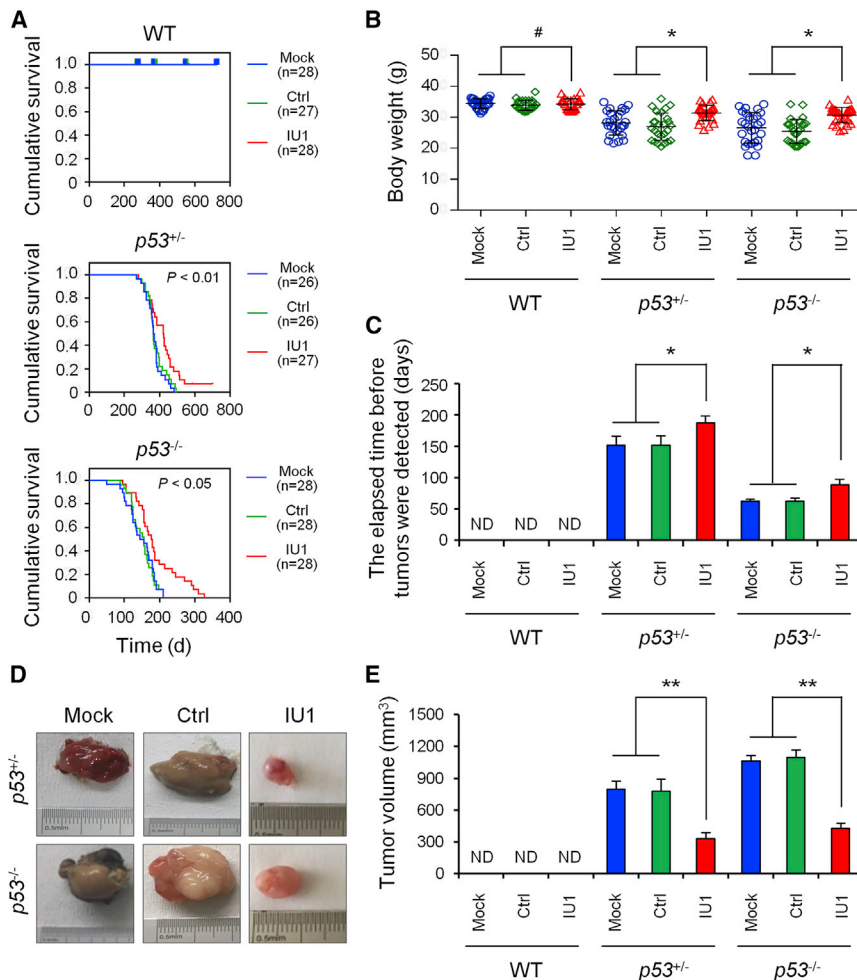

**Figure 1. IU1 Treatment Resulted in Durable Tumor Regressions in p53-Deficient Mice**

(A) Kaplan-Meier survival analysis was used to evaluate the treatment effect of IU1 in wild-type (WT), heterozygous  $p53^{+/-}$  mice, and homozygous  $p53^{-/-}$  mice for OS. (B–E) The effect of IU1 in WT, heterozygous  $p53^{+/-}$  mice, and homozygous  $p53^{-/-}$  mice on the whole body (B), time to detected tumor (C), tumor volume (D and E). Ctrl, control; Mock, mice without treatment; ND, not detected. Data shown are the mean  $\pm$  SD. Statistical analyses were performed with one-way ANOVA (\* $p < 0.05$  and \*\* $p < 0.01$  versus control).

S2C). The mitotic index (Figure S2D) and Ki-67-positive cells (Figure S3A) from IU1-treated mice decreased. Apoptotic (Figure S3B) and senescent cells (Figure S3C) significantly increased, which suggests the mechanisms of tumor inhibition by IU1.

We assessed the p53 levels in response to IU1. In comparison to the control, treatment with IU1 significantly increased the protein levels of p53 (Figure S3D).

#### Treatment of IU1 Induced Cell Growth Arrest, Apoptosis, and Senescence *In Vivo* and *In Vitro*

Recent studies indicate that deubiquitinating enzymes (DUBs) play a pivotal role in the regulation of the cell cycle.<sup>6</sup> We found that IU1 induced significant G2/M-phase growth arrest (Figures 3A–3C). In accordance with these findings, IU1 treatment decreased

G2/M-phase cell-cycle regulatory proteins' cell-division cycle 25C (CDC25C) and its downstream protein CDC2, as well as cyclin B1 (Figure 3A). We also examined the effect of IU1 on G1/S-phase marker proteins, including cyclin E1, cyclin D1, and p21. Results showed that IU1 induced p21 without any significant change in cyclin D1 (Figure 3A).

Recent work has led to the identification of a number of proteins whose expression is increased in senescent preneoplastic lesions,<sup>7</sup> which include the cyclin-dependent kinase (cdk) inhibitors p15-Ink4b and p16-Ink4a, as well as decoy receptor 2 (DcR2). We examined their expression in different types of cancer derived from  $p53^{+/-}$  mice, with or without IU1 treatment (Figure 3A). The OSA from  $p53^{+/-}$  mice induced expression of p15-Ink4b, p16-Ink4a, and DcR2 (Figure 3A).

We next examined whether cell apoptosis markers (c-casp-3, BAX, and BCL-2) are similarly induced by p53 restoration in  $p53^{+/-}$  mice *in vivo*. We observed that the proapoptotic effects of IU1 in MLT from  $p53^{-/-}$  mice were p53 dependent but weakly exhibited in

Here, we investigated the effect of IU1 on tumor growth in the  $p53$  deficiency model *in vivo*. We administered IU1 to C57BL/6J mice, with or without  $p53$  deficiency (Figure S1C). We observed an obviously prolonged overall survival (OS) in  $p53^{+/-}$  and  $p53^{-/-}$  mice with IU1 administration (Figure 1A). Weight from control mice significantly decreased. In contrast, IU1-treated mice showed normal body weight (Figure 1B) and main organs' weights (e.g., liver and lung) (Figures S1D and S1E). Delayed onset of an observable tumor (Figure 1C) and tumor regression (Figures 1D and 1E) was shown in IU1-treated mice compared to the mice in the vehicle-treated group.

With the comparison of the treatment effect of IU1 on the main type of cancer in  $p53$ -deficient mice, including MLT, STS, and OSA (Figures 2A–2C), we verified that the number of mice with MLT obviously decreased in heterozygous  $p53^{+/-}$  mice, and the number of mice with OSA decreased in homozygous  $p53^{-/-}$  mice (Figures 2D and 2E).

The tissue morphology from IU1-treated mice was restored, which were malignant phenotypes in the control group (Figures S2A–

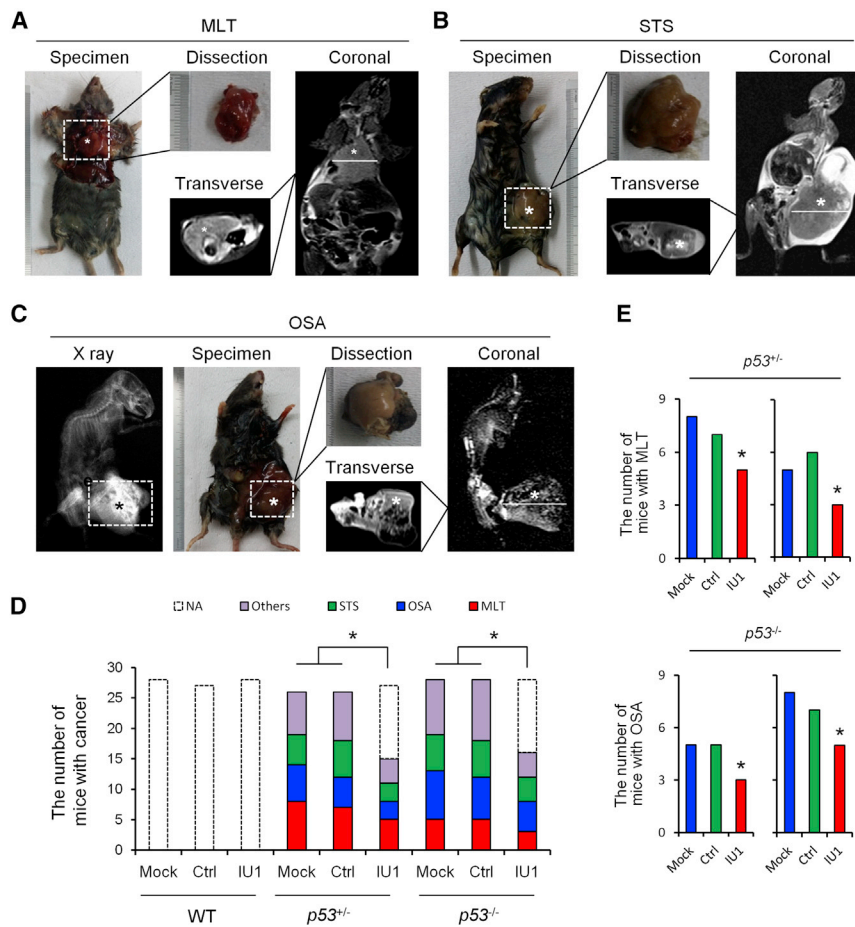

**Figure 2. X-Ray, Micro-CT, and MRI Analysis and Type of Primary Tumors in  $p53$ -Deficient Mice**

(A–C) X-Ray, micro-CT, and MRI analysis of MLT (A), STS (B), and OSA (C) in  $p53$ -deficient mice. (D) The effect of IU1 in WT, heterozygous  $p53^{+/-}$  mice, and homozygous  $p53^{-/-}$  mice on the number of types of cancer. (E) The number of mice with MLT or OSA in  $p53^{+/-}$  and  $p53^{-/-}$  mice. Ctrl, control; MLT, malignant lymphomas of thymus; Mock, mice without treatment; NA, not applicable; OSA, osteosarcoma; STS, soft tissue sarcoma; WT, wild-type.

OSA from  $p53^{+/-}$  mice (Figure 3A), suggesting that IU1 inhibits tumor growth *in vivo*, and different molecular mechanisms are involved in different tumor subtypes with  $p53$  deficiency.

Consistent with the data obtained from  $p53^{+/-}$  mice, we noted significant Annexin V positivity and poly(ADP-ribose) polymerase 1 (PARP1) cleavage in primary malignant cells treated with IU1 by 12 h (Figure 3), with >35% undergoing total loss of viability at a concentration of 0.4  $\mu\text{M}$  (Figure 3F).

To investigate the biological role of USP14 in tumor progression, we performed loss- and gain-of-function studies using the U2OS and WEH1-231 cells that moderately expressed  $p53$  and USP14 as models to generate stable USP14 knockdown or overexpression cell lines (Figure 3G). Knockdown of USP14 induced cell apoptosis (Figure 3H) and decreased cell viability (Figure 3J); in contrast, overexpression of USP14 significantly inhibited cell apoptosis (Figure 3I) and increase cell viability (Figure 3J).

Inhibition of USP14 activity by IU1 restored the  $p53$  protein level and function that lead to upregulation of downstream effectors p21,

p15, beclin-1, and cleaved caspase 3 (Figure 3K). Knockdown of USP14 led to similar results (Figure 3L); on the contrary, overexpression of USP14 significantly reduced the  $p53$  protein level and downstream effectors (Figure 3M), suggesting the regulatory role of USP14 for  $p53$  protein and its downstream effectors.

#### IU1 Induces Ubiquitination and Degradation of COPS5

Deubiquitination enzymes interact with and then deubiquitinate substrates to inhibit their protein degradation by a ubiquitination pathway through the 26S proteasome.<sup>8</sup> We explored the candidate-interacting proteins and potential substrates of USP14 through mass spectrometry after immunoprecipitation. In addition to several previously well-defined proteasome regulatory proteins, including non-ATPase 13 (RPN13),<sup>9</sup> RPN10, proteasome 26S subunit, ATPase 1 (PSMC1),<sup>10</sup> PSMA4, and PSDM1,<sup>11</sup> COPS5, a critical negative regulator, was identified as an interacting partner of USP14 (Figure 4A).

USP14 significantly upregulated COPS5 protein but did not upregulate other interacting protein candidates, including RPN13, RPN10, PSMC1, and PSMA4 (Figure 4B); in contrast, knockdown of USP14 or treatment with IU1 significantly decreased the COPS5 protein level (Figure 4B). Treatment with IU1 significantly decreased the COPS5 protein level in  $p53^{+/-}$  mice (Figure 4C).

Immunoprecipitation analysis by either anti-hemagglutinin (HA) (Figure 4D) or anti-Flag antibody (Figure 4E) confirmed that USP14 associated with COPS5 in 293T cells when both proteins were overexpressed. We also demonstrated that endogenous USP14 interacts with endogenous COPS5 in U2OS cells.

Moreover, USP14 overexpression significantly decreased COPS5 ubiquitination level; in contrast, knockdown of USP14 significantly increased ubiquitination of COPS5 *in vitro* (Figure 4F).

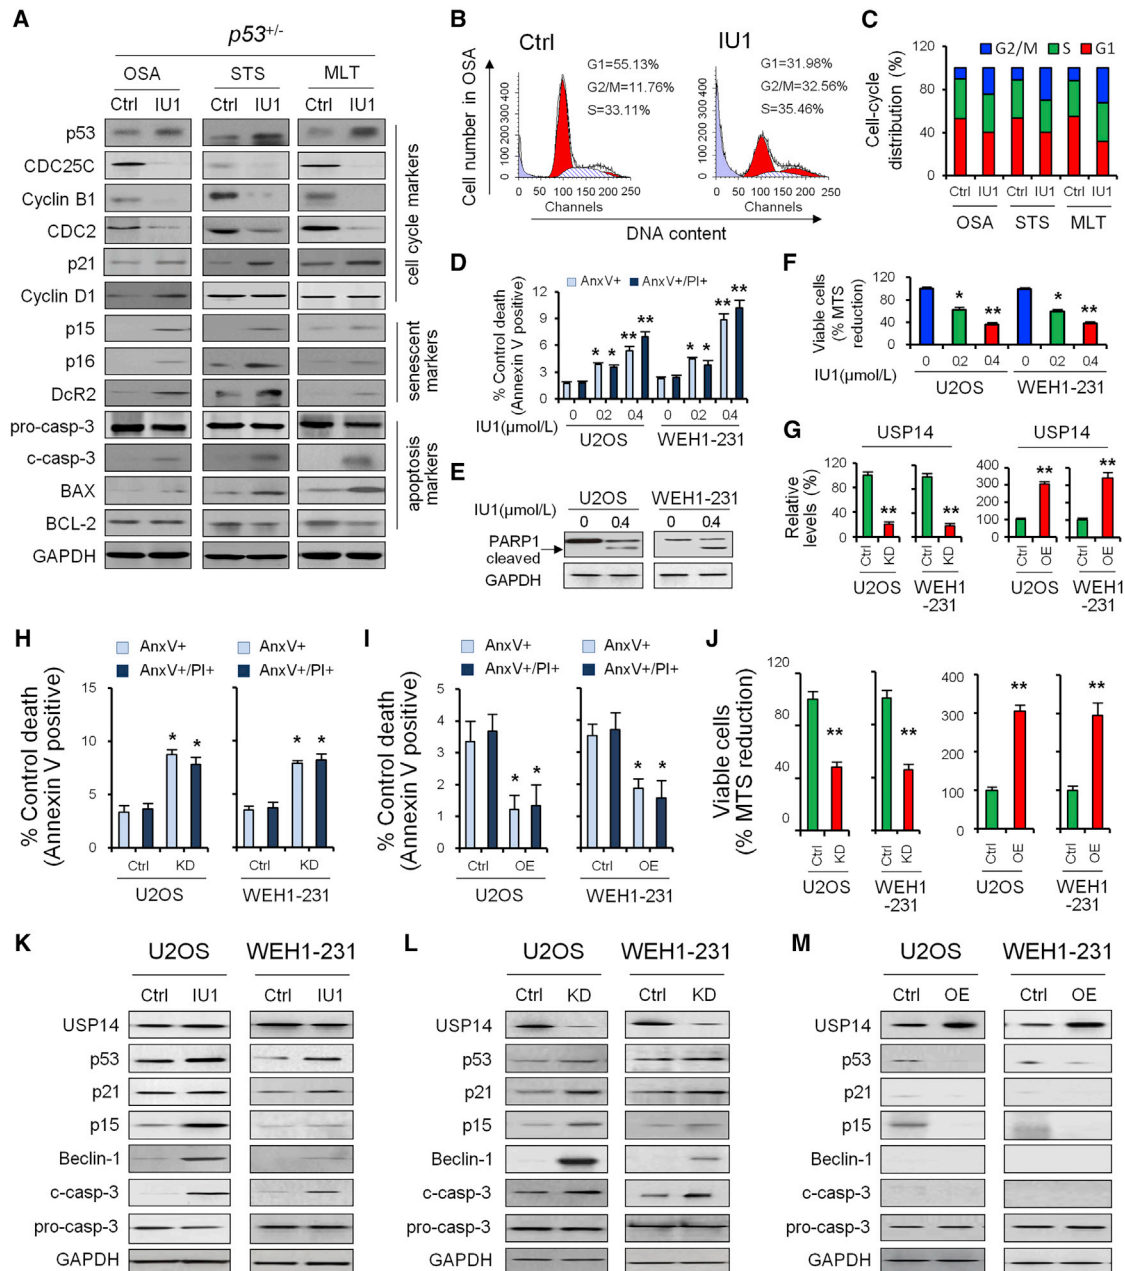

**Figure 3. The Effect of IU1 on the p53-Dependent Regulation Mechanism by USP14**

(A) Western blotting was used to measure the protein level of cell-cycle-, senescent-, and apoptosis-associated markers in heterozygous *p53*<sup>+/-</sup> mice. (B and C) The effect of IU1 in heterozygous *p53*<sup>+/-</sup> mice on cell cycle (B) and distribution (C) was analyzed by flow cytometry. (D) U2OS and WEH1-231 cells were incubated with 0, 0.2, and 0.4 μM IU1 for 24 h, as indicated. Bar graphs (mean ± SD) show percentage of Annexin V (AnxV)<sup>+</sup> or AnxV<sup>+</sup>/propidium iodide (PI)<sup>+</sup> cells and were derived from three independent experiments. (E) Protein levels of cleaved PARP1 were detected by immunoblotting. Glyceraldehyde 3-phosphate dehydrogenase (GAPDH) is useful as protein loading control. (F) Viability of U2OS and WEH1-231 cells was measured after the cells were treated with 0, 0.2, and 0.4 μM IU1 for 24 h. (G) qRT-PCR was used to validate the effect of overexpression or knockdown of USP14. (H and I) Bar graphs (mean ± SD) show percentage of AnxV<sup>+</sup> or AnxV<sup>+</sup>/PI<sup>+</sup> cells before and after USP14 knockdown (H) or overexpression (I). (J) Viability of U2OS and WEH1-231 cells was measured before and after USP14 knockdown or overexpression. (K–M) Western blotting was used to quantify USP14, p53, and p53 target protein level in U2OS and WEH1-231 cells treated with IU1 (K), USP14 knockdown (L), and overexpression (M). Data shown are the mean ± SD. Statistical analyses were performed with one-way ANOVA (\**p* < 0.05 and \*\**p* < 0.01 versus control).



### Inhibition of USP14 Resulted in Durable Tumor Regression through a COPS5-Induced and p53-Dependent Regulation Mechanism in $p53^{+/-}$ Mice

COPS5 mediated degradation of proteins by factors, such as tumor suppressor p53 and cell-cycle inhibitor p27,<sup>12</sup> to enhance cell proliferation. Thus, it is possible that IU1 acts as an anti-tumor inhibitor in tumors with p53 deficiency by inducing degradation of p53 and p27 through the COPS5 pathway. Our results showed that knockdown of COPS5 rescued p53 and the downstream p21 and BAX protein level, induced by USP14 overexpression (Figure 4G). Similarly, IU1 treatment (Figure 4H) or knockdown of USP14 (Figure 4I) rescued the p53 protein, induced by COPS5 overexpression, and enhanced the protein levels of p53 downstream target genes p21 and BAX.

COPS5 overexpression rescued cell apoptosis induced by IU1 treatment (Figure 4J) and enhanced cell viability (Figure 4K). Similarly, COPS5 overexpression rescued cell apoptosis and viability induced by knockdown of USP14 (Figures 4J and 4K); in contrast, COPS5 knockdown induced significant cell apoptosis and reduced cell viability, even when USP14 was overexpressed (Figures 4J and 4K).

The COPS5 protein level significantly increased in various types of tumors in  $p53^{+/-}$  mice (Figure 4L) and decreased after treatment of IU1, and the changes in the COPS5 protein level showed a remarkable negative correlation with the p53 protein level (Figure 4M).

### Inhibition of USP14 Resulted in Durable Tumor Regression through p53-Independent Regulation Mechanism in $p53^{-/-}$ Mice

We further investigated the tumor inhibition mechanism of IU1 through the p53-independent regulation mechanism by USP14 in  $p53^{-/-}$  mice.

The COPS5 protein level significantly increased in various types of tumors in  $p53^{-/-}$  mice (Figure 5A) and decreased after treatment of IU1, and the changes in COPS5 protein level showed a remarkable negative correlation with the USP14 protein level (Figure 5B).

IU1 treatment in  $p53^{-/-}$  mice resulted in tumor regression (Figure 1), increased apoptosis, induced cell senescence, inhibited cell proliferation, and the transition of cell cycle (Figure 3) that could be attributed to COPS5 substrates, including proto-oncogene activator protein 1 (AP-1), E2F transcription factor 1 (E2F1), cell-cycle inhibitor p27, and cyclin E1 (Figure 5C).

Overexpression of USP14 restored COPS5 protein level and led to an upregulation of downstream effectors AP-1 and E2F1 and reduced p27 and cyclin E1 levels (Figure 5D); in contrast, knockdown of USP14 (Figure 5E) or inhibition of USP14 activity by IU1 (Figure 5F) reduced COPS5 protein level and led to downregulation of downstream effectors AP-1 and E2F1 and induced p27 and cyclin E1 levels in primary cultured osteosarcoma cells (PCOCs) and murine thymic lymphoma T cell (MTLTC) lines from  $p53^{-/-}$  mice.

COPS5 overexpression rescued cell apoptosis induced by IU1 treatment (Figure 5G) and enhanced cell viability (Figure 5J). Similarly, COPS5 overexpression rescued cell apoptosis (Figure 5H) and enhanced viability (Figure 5K), induced by knockdown of USP14; in contrast, COPS5 knockdown induced significant cell apoptosis (Figure 5I) and reduced cell viability (Figure 5L), even when USP14 was overexpressed.

Thus, our results suggested that IU1 treatment rescued p53 protein level and blocked p53 ubiquitination degradation induced by USP14-dependent COPS5 deubiquitination and regulation for p53 and other transcription factors. Given that IU1 is already under clinical evaluation in advanced solid malignancies,<sup>13</sup> the translation of our preclinical findings could be fast tracked into the clinic for individuals with p53 expression and functional deficiency.

## DISCUSSION

Cancer is associated with evading apoptosis and uncontrolled cell cycle and development of apoptosis resistance and insensitivity to anti-growth signal in cancer cells, which are significant contributing factors to the failure of cancer therapies.<sup>14–16</sup> Thus, induction of apoptosis and control of cell-cycle progression would be ideal strategies for effective cancer therapy.<sup>17–20</sup> One promising approach to achieving this is the modulation of p53 or the components of the p53 signaling pathways.<sup>21–24</sup> The p53 protein acts biochemically as a transcription factor and biologically as a tumor suppressor, exemplified by the fact that many cancers selectively inactivate p53 and/or the p53 pathway.<sup>25–27</sup> Loss of p53 functions accelerates tumorigenesis compared to mice expressing at least one wild-type Trp53 allele.<sup>1,26,28,29</sup>

In some cancer cells that bear a wild-type p53, p53 is nonfunctional, either by being excluded from the nucleus where p53 acts as a transcription factor or by being targeted for degradation by E3 ubiquitin ligase, including Mdm2 and COPS5.<sup>4,30–33</sup> COPS5, also known as Jab1 or CSN5, is implicated in regulating p53 activity and is overexpressed in various tumors.<sup>34</sup> However, the precise roles of COPS5 in the p53 network and in tumorigenesis are not well characterized.

In order to develop therapeutic strategies for tumors with p53 deficiency *in vivo*, we have utilized a mouse strain carrying a germline disruption of the gene, which eliminates synthesis of the p53 protein and is highly predisposed to malignancy. We show that USP14, a DUB associated with the proteasome in mammalian cells and reversibly associated with the 19S regulatory particle, can deubiquitilate and upregulate COPS5 to promote its nuclear transport. COPS5 was found to interact with p53, and COPS5 expression leads to p53 degradation, facilitating Mdm2-mediated p53 ubiquitination and promoting p53 nuclear export. Additionally, COPS5 can antagonize the transcriptional activity of p53, which demonstrates that USP14 is a pivotal regulator for COPS5 and p53. Thus, our studies may pave the way for targeting USP14 for anti-cancer drug development.

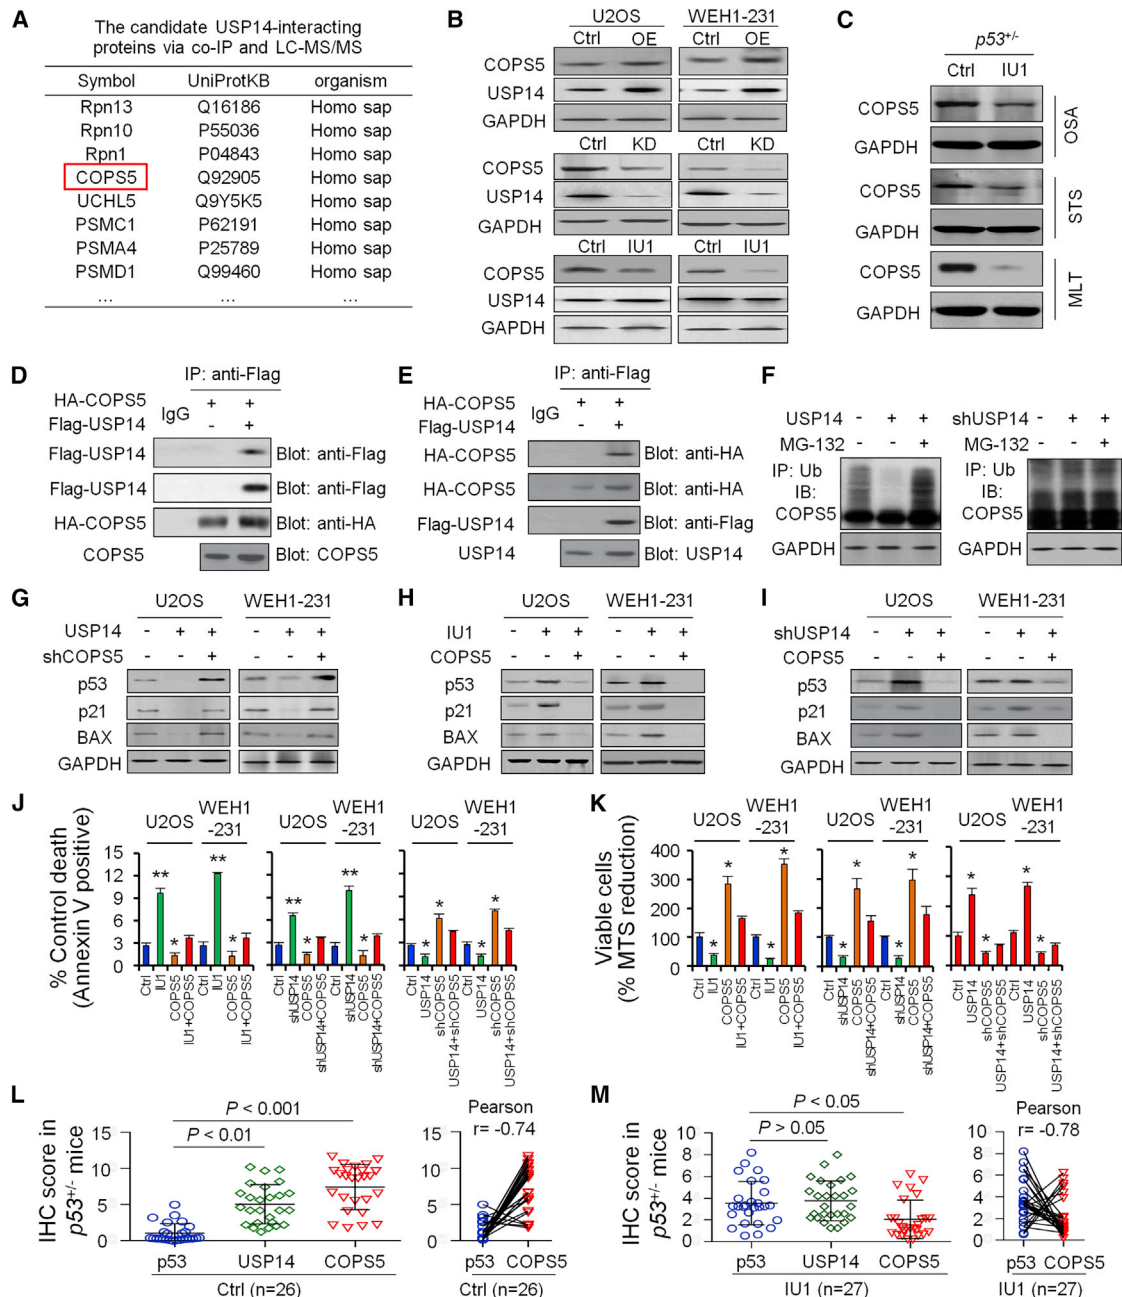

**Figure 4. IU1 Inhibits USP14 Deubiquitinating Activity to Upregulate p53 through COP55**

(A) Coimmunoprecipitation (coIP) and liquid chromatography–tandem mass spectrometry (LC-MS/MS) was used to screen the candidate of USP14-interacting proteins. (B) Western blotting was used to quantify COP55 protein level in U2OS and WEH1-231 cells after IU1 treatment, USP14 knockdown, or overexpression. (C) Western blotting was used to quantify COP55 protein level in OSA, STS, and MLT tissues from  $p53^{+/-}$  mice. (D and E) Immunoprecipitation analysis by either anti-HA (D) or anti-Flag antibody (E) after HA-COP55, together with Flag-USP14 expression plasmid, was cotransfected in 293T cells. (F) COP55 ubiquitination level was detected *in vitro* in 293T cells after USP14 overexpression or treatment with MG-132. (G–I) p53, p21, and BAX protein level was detected *in vitro* in U2OS and WEH1-231 cells after USP14 overexpression and COP55 knockdown (G), COP55 knockdown with IU1 treatment (H), or USP14 knockdown and COP55 overexpression (I). (J) Bar graphs (mean  $\pm$  SD) show percentage of AnxV<sup>+</sup> cells treated with DMSO (Ctrl), IU1 treatment, knockdown, and overexpression of USP14 or COP55. (K) Viability was measured in U2OS and WEH1-231 cells treated with DMSO (Ctrl), IU1 treatment, knockdown, and overexpression of USP14 or COP55. (L and M) Expression and association of p53, USP14, and COP55 in primary tumor tissues from  $p53^{+/-}$  mice treated with DMSO (L; Ctrl, n = 26) or IU1 (M; n = 27).

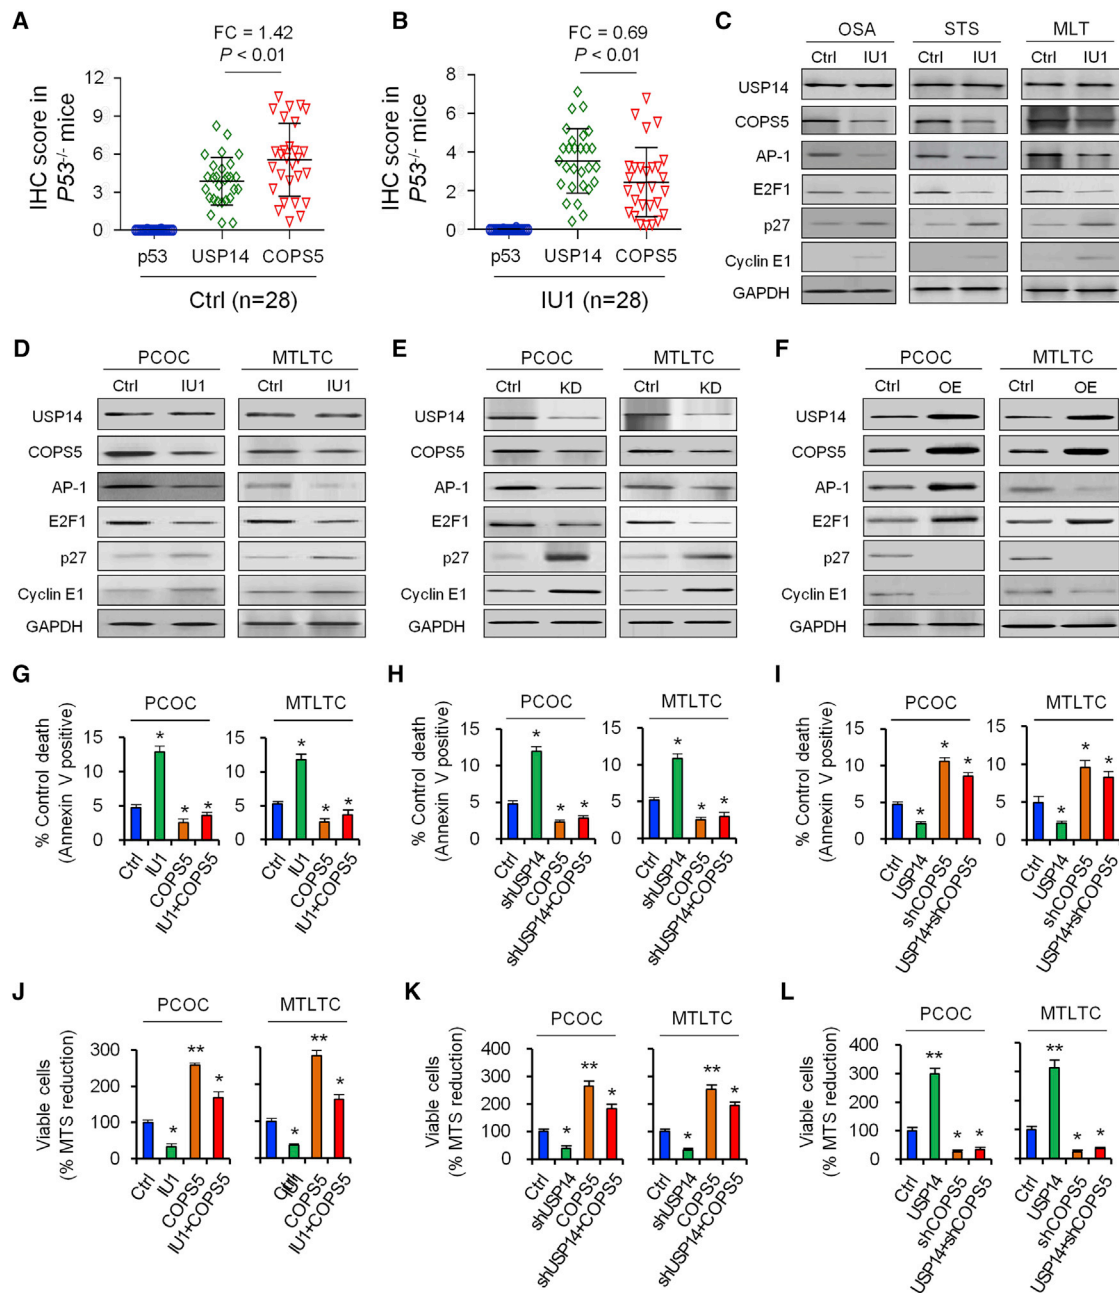

**Figure 5. Effect of IU1 on COPS5-Induced Downstream Effectors *In Vivo* and *In Vitro***

(A and B) Expression and association of p53, USP14, and COPS5 in primary tumor tissues from *p53*<sup>-/-</sup> mice treated with DMSO (A; Ctrl, n = 28) or IU1 (B; n = 28). (C) Western blotting was used to measure the protein level of USP14, COPS5, and COPS5 downstream effectors in homozygous *p53*<sup>-/-</sup> mice. (D–F) Western blotting was used to measure the protein levels of USP14, COPS5, and COPS5 downstream effectors in PCOC and MTLTC cells with treatment of IU1 (D), knockdown (E), or overexpression (F) of USP14. (G–I) Bar graphs (mean ± SD) show percentage of Annexin V<sup>+</sup> cells treated with IU1 treatment with or without COPS5 overexpression (G), USP14 knockdown with or without COPS5 overexpression (H), and USP14 overexpression with or without COPS5 knockdown (I). (J–L) Viability was measured in PCOC and MTLTC cells treated with IU1 treatment with or without COPS5 overexpression (J), USP14 knockdown with or without COPS5 overexpression (K), and USP14 overexpression with or without COPS5 knockdown (L). Data shown are the mean ± SD. Statistical analyses were performed with one-way ANOVA (\**p* < 0.05 and \*\**p* < 0.01 versus control).

To restore wild-type p53 conformation in p53-deficient cancer cells, a small molecule compound, 19S regulatory particle inhibitor IU1, was utilized. IU1 specifically and selectively blocks USP14 deubiquitilat-

ing activity without inhibiting proteasome activity and can block growth and induce apoptosis. It shows antitumor activity of b-AP15, a novel, small molecule inhibitor of deubiquitilating enzyme

USP14 and ubiquitin carboxyl-terminal hydrolase isozyme L5 (UCHL5), in a number of tumor models, including multiple myeloma, and it overcomes bortezomib resistance.<sup>35</sup> Tumor cells are rapidly committed to apoptosis/cell death after exposure to IU1 through binding to USP14 and react with intracellular nucleophiles, such as cysteine thiolates, to inhibit proteasome function. Thus, IU1 targets the proteasome-associated USP14 and inhibits its activities, resulting in a rapid accumulation of protein-ubiquitin conjugates but without inhibiting the proteolytic activities of 20S proteasomes.<sup>36</sup>

Our previous results showed that IU1 exhibits cytotoxic effects against various cancer cell lines *in vitro*, selectively kills cancer cells from hepatocellular carcinoma (HCC) patients *ex vivo*, and efficiently inhibits the growth of non-small cell lung carcinoma xenografts in nude mice.<sup>37</sup> In the current study, *in vivo* studies show that IU1 is well tolerated, inhibits tumor growth, and prolongs survival. Moreover, IU1 induces cell-cycle arrest, decreases viability, and induces apoptosis in cultured cell lines and patient-derived primary cells.

The 26S proteasome complex, which degrades ubiquitinated proteins, contains the 20S core particle and a 19S regulatory particle necessary for binding protein substrates.<sup>38–42</sup> The mammalian 19S cap contains three DUBs that unfold and deubiquitinate proteins prior to their entry into the proteasomal core.<sup>43–47</sup> Of the three, USP14 and UCHL5 reversibly associate with the proteasome through scaffolding proteins RPN1 and RPN13, respectively.<sup>48</sup> Suppression of either DUB or scaffolding protein individually via RNA interference partly upregulates proteasomal catalytic activity and accumulation of polyubiquitinated proteins.<sup>49–53</sup> The combined inhibition of both UCHL5 and USP14 results in lethality, indicates their nonredundancy, and suggests their role in maintaining cancer cell survival, which partly explains the finding that b-AP15, which selectively disrupts both USP14 and UCHL5 activity, was shown to significantly increase cancer cell apoptosis *in vitro* and to inhibit tumor progression, as well as exhibit robust antitumor activity.<sup>54–56</sup>

Anti-cancer activity of IU1 is associated with growth arrest through inhibition of deubiquitinating activity of USP14, downregulation of COPS5, and upregulation of p53-dependent p21, p15, and beclin-1 and p53-independent COPS5 downstream effects AP-1, E2F1, p27, and cyclin E1, as well as induction of caspase-dependent apoptosis. Additionally, the effects of IU1 were shown to be independent of p53 status, as well as the expression of BCL-2, both of which can influence the response to bortezomib therapy.

### Conclusions

Our preclinical data, showing efficacy of USP14 in p53-deficient disease models, validates targeting DUBs in the ubiquitin proteasomal cascade and provides the new anticancer drug target and framework for clinical evaluation of the USP14 inhibitor to improve outcome for patients with p53 deficiency.

## METHODS

### Animal Studies

All experimental procedures were approved by the Institutional Animal Care and Use Committee (IACUC) guidelines at Tongji University School of Medicine (SYDW-19-215). Experiments were performed in 9-month-old wild-type and  $p53^{+/-}$  mice and 3-month-old  $p53^{-/-}$  mice. Genomic DNA from tail biopsies was genotyped by polymerase chain reaction (PCR).<sup>57</sup> IU1 (5 mg/kg) was administered intraperitoneally (i.p.) weekly for the number of days indicated.<sup>58</sup> All mice were monitored by X-ray, magnetic resonance imaging (MRI), or micro-computed tomography (CT) diagnosis for tumor phenotypes, three times a week.<sup>59</sup> [Supplemental Methods](#) contains detailed information.

### Cell Treatments

HEK293T, U2OS, and WEHI-231 cells were cultured in DMEM media and supplemented with 10% (v/v) fetal bovine serum (FBS), 100 U/mL penicillin, and 100 mg/mL streptomycin for viability, flow cytometry, immunofluorescence, immunoprecipitation, and functional analysis. Derivation of MTLTC lines and primary cultured osteosarcoma cell (PCOC) lines was obtained from  $p53^{-/-}$  mice and cultured.<sup>60,61</sup>

### Plasmid Construction and Transfection

Gene overexpression was performed using the pMSCV retroviral plasmid.<sup>62</sup> Knockdown cell lines were generated using short hairpin RNAs and retroviral transduction.<sup>63</sup> All constructs were confirmed by PCR and Sanger sequencing. The transfected cells were harvested at 48 h post-transfection for further assays.

### RNA Isolation, cDNA Synthesis, and qRT-PCR

RNA was isolated using TRIzol reagent. qPCR was conducted using the TaqMan Universal PCR Kit (Life Technologies, Carlsbad, CA, USA).

### Immunoprecipitation and Immunoblotting

Cells were pretreated with MG132 or IU1 for the indicated time periods. Immunoprecipitations were performed using the indicated primary antibody and protein A/G agarose beads. For immunoblotting, total proteins were extracted from cells following the standard protocol.<sup>64</sup>

### Histology and Immunohistochemistry (IHC) Analysis

Standard IHC and H&E staining were used to evaluate protein expression levels in tumor samples.<sup>65</sup> Tissues from mice were flushed and fixed in 4% formaldehyde in PBS for 24 h. Samples were then dehydrated and embedded in paraffin, sectioned at 5  $\mu$ m, and processed for H&E staining. Serial sections were stained in parallel with the primary antibody replaced by PBS as controls.

### Mass Spectrometry

Pellets of U2OS cell expressing Flag-UCH37 from two, 150-mm plates were lysed, and digestion with trypsin was performed for liquid chromatography-tandem mass spectrometry analysis.<sup>66</sup>



### Statistical Analysis

Data were expressed as mean  $\pm$  SD. Categorical data were reported as numbers and percentages. Statistical significance was assessed by Student's t test or one-way ANOVA with Tukey test using the SPSS 20.0 software program or Prism 6.0 GraphPad. The level of significance was set as  $p < 0.05$ .

### SUPPLEMENTAL INFORMATION

Supplemental Information can be found online at <https://doi.org/10.1016/j.omto.2019.12.013>.

### AUTHOR CONTRIBUTIONS

Y.-S.M., X.-F.W., Y.-J.Z., and D.F. designed the study. Y.-S.M., X.-F.W., Y.-J.Z., P.L., H.-D.L., H.-Q.Y., R.-T.X., C.-Y.J., and D.F. performed the cytological experiments. Y.-S.M., X.-F.W., Y.-J.Z., P.L., H.-D.L., L.L., G.-X.L., Z.-Y.C., J.-J.Z., S.-B.X., Q.X., and D.F. performed the animal experiments. Y.-S.M., Y.-J.Z., H.-D.L., and D.F. performed the statistical analyses and interpreted the data. Y.-S.M., X.-F.W., Z.-W.L., F.Y., Q.X., and D.F. contributed to study materials and consumables. Y.-S.M., X.-F.W., Y.-J.Z., and D.F. wrote the manuscript. All authors contributed to the final version of the manuscript and approved the final manuscript.

### CONFLICTS OF INTEREST

The authors declare no competing interests.

### ACKNOWLEDGMENTS

We would like to thank LetPub (<https://www.letpub.com>) for providing linguistic assistance during the preparation of this manuscript. The datasets supporting the conclusions of this article are included within the article. This study was supported partly by grants from the National Natural Science Foundation of China (81972214, 81772932, 81472202, 81201535, 81302065, 81671716, 81301993, 81372175, and 81472209); Fundamental Research Funds for the Central Universities (22120170212 and 22120170117); Shanghai Natural Science Foundation (12ZR1436000 and 16ZR1428900); Shanghai Municipal Commission of Health and Family Planning (201540228 and 201440398); Construction of Clinical Medical Center for Tumor Biological Samples in Nantong (HS2016004); and Wu Jieping Medical Foundation (320.6750.14326).

### REFERENCES

- Mastropasqua, F., Marzano, F., Valletti, A., Aiello, I., Di Tullio, G., Morgano, A., Liuni, S., Ranieri, E., Guerrini, L., Gasparre, G., et al. (2017). TRIM8 restores p53 tumour suppressor function by blunting N-MYC activity in chemo-resistant tumours. *Mol. Cancer* 16, 67.
- Adriaens, C., Standaert, L., Barra, J., Latil, M., Verfaillie, A., Kalev, P., Boeckx, B., Wijnhoven, P.W., Radaelli, E., Vermi, W., et al. (2016). p53 induces formation of NEAT1 lncRNA-containing paraspeckles that modulate replication stress response and chemosensitivity. *Nat. Med.* 22, 861–868.
- Wu, S.D., Ma, Y.S., Fang, Y., Liu, L.L., Fu, D., and Shen, X.Z. (2012). Role of the microenvironment in hepatocellular carcinoma development and progression. *Cancer Treat. Rev.* 38, 218–225.
- Mancini, F., Teveroni, E., Di Conza, G., Monteleone, V., Arisi, I., Pellegrino, M., Buttarelli, M., Pieroni, L., D'Onofrio, M., Urbani, A., et al. (2017). MDM4 actively restrains cytoplasmic mTORC1 by sensing nutrient availability. *Mol. Cancer* 16, 55.
- Jacks, T., Remington, L., Williams, B.O., Schmitt, E.M., Halachmi, S., Bronson, R.T., and Weinberg, R.A. (1994). Tumor spectrum analysis in p53-mutant mice. *Curr. Biol.* 4, 1–7.
- Sun, H., Zhang, Q., Jing, Y.Y., Zhang, M., Wang, H.Y., Cai, Z., Liuyu, T., Zhang, Z.D., Xiong, T.C., Wu, Y., et al. (2017). USP13 negatively regulates antiviral responses by deubiquitinating STING. *Nat. Commun.* 8, 15534.
- Kumar, D., Gorain, M., Kundu, G., and Kundu, G.C. (2017). Therapeutic implications of cellular and molecular biology of cancer stem cells in melanoma. *Mol. Cancer* 16, 7.
- Fang, Y., Fu, D., and Shen, X.Z. (2010). The potential role of ubiquitin C-terminal hydrolases in oncogenesis. *Biochim. Biophys. Acta* 1806, 1–6.
- Husnjak, K., Elsasser, S., Zhang, N., Chen, X., Randles, L., Shi, Y., Hofmann, K., Walters, K.J., Finley, D., and Dikic, I. (2008). Proteasome subunit Rpn13 is a novel ubiquitin receptor. *Nature* 453, 481–488.
- Li, T., Duan, W., Yang, H., Lee, M.K., Bte Mustafa, F., Lee, B.H., and Teo, T.S. (2001). Identification of two proteins, S14 and UIP1, that interact with UCH37. *FEBS Lett.* 488, 201–205.
- Huang, H., Liu, N., Liao, Y., Liu, N., Cai, J., Xia, X., Guo, Z., Li, Y., Wen, Q., Yin, Q., et al. (2017). Platinum-containing compound platinum pyrithione suppresses ovarian tumor proliferation through proteasome inhibition. *J. Exp. Clin. Cancer Res.* 36, 79.
- Lu, R., Hu, X., Zhou, J., Sun, J., Zhu, A.Z., Xu, X., Zheng, H., Gao, X., Wang, X., Jin, H., et al. (2016). COPS5 amplification and overexpression confers tamoxifen-resistance in ER $\alpha$ -positive breast cancer by degradation of NCoR. *Nat. Commun.* 7, 12044.
- Liu, B., Jiang, S., Li, M., Xiong, X., Zhu, M., Li, D., Zhao, L., Qian, L., Zhai, L., Li, J., et al. (2018). Proteome-wide analysis of USP14 substrates revealed its role in hepatosteatosis via stabilization of FASN. *Nat. Commun.* 9, 4770.
- Lu, X., Nowicka, U., Sridharan, V., Liu, F., Randles, L., Hymel, D., Dyba, M., Tarasov, S.G., Tarasova, N.I., Zhao, X.Z., et al. (2017). Structure of the Rpn13-Rpn2 complex provides insights for Rpn13 and Uch37 as anticancer targets. *Nat. Commun.* 8, 15540.
- Lee, B.H., Lee, M.J., Park, S., Oh, D.C., Elsasser, S., Chen, P.C., Gartner, C., Dimova, N., Hanna, J., Gygi, S.P., et al. (2010). Enhancement of proteasome activity by a small-molecule inhibitor of USP14. *Nature* 467, 179–184.
- Ma, Y.S., Huang, T., Zhong, X.M., Zhang, H.W., Cong, X.L., Xu, H., Lu, G.X., Yu, F., Xue, S.B., Lv, Z.W., and Fu, D. (2018). Proteogenomic characterization and comprehensive integrative genomic analysis of human colorectal cancer liver metastasis. *Mol. Cancer* 17, 139.
- Chen, F., Long, Q., Fu, D., Zhu, D., Ji, Y., Han, L., Zhang, B., Xu, Q., Liu, B., Li, Y., et al. (2018). Targeting SPINK1 in the damaged tumour microenvironment alleviates therapeutic resistance. *Nat. Commun.* 9, 4315.
- Rajaraman, S., Canjuga, D., Ghosh, M., Codrea, M.C., Sieger, R., Wedekind, F., Tatagiba, M., Koch, M., Lauer, U.M., Nahnsen, S., et al. (2018). Measles Virus-Based Treatments Trigger a Pro-inflammatory Cascade and a Distinctive Immunopeptidome in Glioblastoma. *Mol. Ther. Oncolytics* 12, 147–161.
- Hong, B., Muili, K., Bolyard, C., Russell, L., Lee, T.J., Banasavadi-Siddegowda, Y., Yoo, J.Y., Yan, Y., Ballester, L.Y., Bockhorst, K.H., and Kaur, B. (2018). Suppression of HMGB1 Released in the Glioblastoma Tumor Microenvironment Reduces Tumoral Edema. *Mol. Ther. Oncolytics* 12, 93–102.
- Mooney, R., Majid, A.A., Batalla-Covello, J., Machado, D., Liu, X., Gonzaga, J., Tirughana, R., Hammad, M., Lesniak, M.S., Curiel, D.T., and Aboody, K.S. (2018). Enhanced Delivery of Oncolytic Adenovirus by Neural Stem Cells for Treatment of Metastatic Ovarian Cancer. *Mol. Ther. Oncolytics* 12, 79–92.
- Bressy, C., Hastie, E., and Grdzlishvili, V.Z. (2017). Combining Oncolytic Virotherapy with p53 Tumor Suppressor Gene Therapy. *Mol. Ther. Oncolytics* 5, 20–40.
- Echchannaoui, H., Petschenka, J., Ferreira, E.A., Hauptrock, B., Lotz-Jenne, C., Voss, R.H., and Theobald, M. (2019). A Potent Tumor-Reactive p53-Specific Single-Chain TCR without On- or Off-Target Autoimmunity In Vivo. *Mol. Ther.* 27, 261–271.
- Singh, A., Bhattacharyya, N., Srivastava, A., Pruet, N., Ripley, R.T., Schrupp, D.S., and Hoang, C.D. (2019). MicroRNA-215-5p Treatment Suppresses Mesothelioma Progression via the MDM2-p53-Signaling Axis. *Mol. Ther.* 27, 1665–1680.

24. Vile, R.G. (2018). The Immune System in Oncolytic Immunovirotherapy: Gospel, Schism and Heresy. *Mol. Ther.* 26, 942–946.
25. Toh, T.B., Lim, J.J., and Chow, E.K. (2017). Epigenetics in cancer stem cells. *Mol. Cancer* 16, 29.
26. Ylä-Herttua, S. (2018). CRISPR/Cas9 and p53: An Odd Couple Requiring Relationship Management. *Mol. Ther.* 26, 2711.
27. Ma, Y.S., Yu, F., Zhong, X.M., Lu, G.X., Cong, X.L., Xue, S.B., Xie, W.T., Hou, L.K., Pang, L.J., Wu, W., et al. (2018). miR-30 family reduction maintains self-renewal and promotes tumorigenesis in NSCLC-initiating cells by targeting oncogene TM4SF1. *Mol. Ther.* 26, 2751–2765.
28. Yi, M., Jiao, D., Xu, H., Liu, Q., Zhao, W., Han, X., and Wu, K. (2018). Biomarkers for predicting efficacy of PD-1/PD-L1 inhibitors. *Mol. Cancer* 17, 129.
29. Meister, M.T., Boedicker, C., Klingebiel, T., and Fulda, S. (2018). Hedgehog signaling negatively co-regulates BH3-only protein Noxa and TAp73 in TP53-mutated cells. *Cancer Lett.* 429, 19–28.
30. Lee, C.C., Yang, W.H., Li, C.H., Cheng, Y.W., Tsai, C.H., and Kang, J.J. (2016). Ligand independent aryl hydrocarbon receptor inhibits lung cancer cell invasion by degradation of Smad4. *Cancer Lett.* 376, 211–217.
31. Thiem, A., Hesbacher, S., Kneitz, H., di Primio, T., Heppt, M.V., Hermanns, H.M., Goebeler, M., Meierjohann, S., Houben, R., and Schrama, D. (2019). IFN-gamma-induced PD-L1 expression in melanoma depends on p53 expression. *J. Exp. Clin. Cancer Res.* 38, 397.
32. Li, Z., Yi, L., Gao, P., Zhang, R., and Li, J. (2019). The cornerstone of integrating circulating tumor DNA into cancer management. *Biochim. Biophys. Acta Rev. Cancer* 1871, 1–11.
33. Subburayan, K., Thayyullathil, F., Pallichankandy, S., Rahman, A., and Galadari, S. (2018). Par-4-dependent p53 up-regulation plays a critical role in thymoquinone-induced cellular senescence in human malignant glioma cells. *Cancer Lett.* 426, 80–97.
34. Wang, X., Stafford, W., Mazurkiewicz, M., Fryknäs, M., Brnjic, S., Zhang, X., Gullbo, J., Larsson, R., Arnér, E.S., D'Arcy, P., and Linder, S. (2014). The 19S Deubiquitinase inhibitor b-AP15 is enriched in cells and elicits rapid commitment to cell death. *Mol. Pharmacol.* 85, 932–945.
35. Tian, Z., D'Arcy, P., Wang, X., Ray, A., Tai, Y.T., Hu, Y., Carrasco, R.D., Richardson, P., Linder, S., Chauhan, D., and Anderson, K.C. (2014). A novel small molecule inhibitor of deubiquitylating enzyme USP14 and UCHL5 induces apoptosis in multiple myeloma and overcomes bortezomib resistance. *Blood* 123, 706–716.
36. Kuo, C.L., and Goldberg, A.L. (2017). Ubiquitinated proteins promote the association of proteasomes with the deubiquitinating enzyme Usp14 and the ubiquitin ligase Ube3c. *Proc. Natl. Acad. Sci. USA* 114, E3404–E3413.
37. Yu, F., Liu, J.B., Wu, Z.J., Xie, W.T., Zhong, X.J., Hou, L.K., Wu, W., Lu, H.M., Jiang, X.H., Jiang, J.J., et al. (2018). Tumor suppressive microRNA-124a inhibits stemness and enhances gefitinib sensitivity of non-small cell lung cancer cells by targeting ubiquitin-specific protease 14. *Cancer Lett.* 427, 74–84.
38. Dheilily, E., Moine, V., Broyer, L., Salgado-Pires, S., Johnson, Z., Papaioannou, A., Cons, L., Calloud, S., Majocchi, S., Nelson, R., et al. (2017). Selective Blockade of the Ubiquitous Checkpoint Receptor CD47 Is Enabled by Dual-Targeting Bispecific Antibodies. *Mol. Ther.* 25, 523–533.
39. Zou, H., Chen, H., Zhou, Z., Wan, Y., and Liu, Z. (2019). ATXN3 promotes breast cancer metastasis by deubiquitinating KLF4. *Cancer Lett.* 467, 19–28.
40. Xia, X., Liao, Y., Huang, C., Liu, Y., He, J., Shao, Z., Jiang, L., Dou, Q.P., Liu, J., and Huang, H. (2019). Deubiquitination and stabilization of estrogen receptor  $\alpha$  by ubiquitin-specific protease 7 promotes breast tumorigenesis. *Cancer Lett.* 465, 118–128.
41. Cui, H., Wang, Q., Lei, Z., Feng, M., Zhao, Z., Wang, Y., and Wei, G. (2019). DTL promotes cancer progression by PDCD4 ubiquitin-dependent degradation. *J. Exp. Clin. Cancer Res.* 38, 350.
42. Wu, X., Liu, M., Zhu, H., Wang, J., Dai, W., Li, J., Zhu, D., Tang, W., Xiao, Y., Lin, J., et al. (2019). Ubiquitin-specific protease 3 promotes cell migration and invasion by interacting with and deubiquitinating SUZ12 in gastric cancer. *J. Exp. Clin. Cancer Res.* 38, 277.
43. Martin, N.T., and Bell, J.C. (2018). Oncolytic Virus Combination Therapy: Killing One Bird with Two Stones. *Mol. Ther.* 26, 1414–1422.
44. Lim, J.A., Sun, B., Puertollano, R., and Raben, N. (2018). Therapeutic Benefit of Autophagy Modulation in Pompe Disease. *Mol. Ther.* 26, 1783–1796.
45. Gu, J., Mao, W., Ren, W., Xu, F., Zhu, Q., Lu, C., Lin, Z., Zhang, Z., Chu, Y., Liu, R., and Ge, D. (2019). Ubiquitin-protein ligase E3C maintains non-small-cell lung cancer stemness by targeting AHNK-p53 complex. *Cancer Lett.* 443, 125–134.
46. Han, H.G., Moon, H.W., and Jeon, Y.J. (2018). ISG15 in cancer: Beyond ubiquitin-like protein. *Cancer Lett.* 438, 52–62.
47. Zhou, S., Lu, J., Li, Y., Chen, C., Cai, Y., Tan, G., Peng, Z., Zhang, Z., Dong, Z., Kang, T., and Tang, F. (2018). MNAT1 is overexpressed in colorectal cancer and mediates p53 ubiquitin-degradation to promote colorectal cancer malignance. *J. Exp. Clin. Cancer Res.* 37, 284.
48. Hillert, E.K., Brnjic, S., Zhang, X., Mazurkiewicz, M., Saei, A.A., Mofers, A., Selvaraju, K., Zubarev, R., Linder, S., and D'Arcy, P. (2019). Proteasome inhibitor b-AP15 induces enhanced proteotoxicity by inhibiting cytoprotective aggresome formation. *Cancer Lett.* 448, 70–83.
49. Hotani, T., Mizuguchi, H., and Sakurai, F. (2018). Systemically Administered Reovirus-Induced Downregulation of Hypoxia Inducible Factor-1 $\alpha$  in Subcutaneous Tumors. *Mol. Ther. Oncolytics* 12, 162–172.
50. Xing, F., Wang, S., and Zhou, J. (2018). The expression of microRNA-598 inhibits ovarian cancer cell proliferation and metastasis by targeting URI. *Mol. Ther. Oncolytics* 12, 9–15.
51. Wei, W.S., Chen, X., Guo, L.Y., Li, X.D., Deng, M.H., Yuan, G.J., He, L.Y., Li, Y.H., Zhang, Z.L., Jiang, L.J., et al. (2018). TRIM65 supports bladder urothelial carcinoma cell aggressiveness by promoting ANXA2 ubiquitination and degradation. *Cancer Lett.* 435, 10–22.
52. Gu, Y., Lv, F., Xue, M., Chen, K., Cheng, C., Ding, X., Jin, M., Xu, G., Zhang, Y., Wu, Z., et al. (2018). The deubiquitinating enzyme UCHL1 is a favorable prognostic marker in neuroblastoma as it promotes neuronal differentiation. *J. Exp. Clin. Cancer Res.* 37, 258.
53. Ma, J., Chang, K., Peng, J., Shi, Q., Gan, H., Gao, K., Feng, K., Xu, F., Zhang, H., Dai, B., et al. (2018). SPOP promotes ATF2 ubiquitination and degradation to suppress prostate cancer progression. *J. Exp. Clin. Cancer Res.* 37, 145.
54. Parasramka, M., Yan, I.K., Wang, X., Nguyen, P., Matsuda, A., Maji, S., Foye, C., Asmann, Y., and Patel, T. (2017). BAP1 dependent expression of long non-coding RNA NEAT-1 contributes to sensitivity to gemcitabine in cholangiocarcinoma. *Mol. Cancer* 16, 22.
55. Castro, I., Ekinci, E., Huang, X., Cheaito, H.A., Ahn, Y.H., Olivero-Verbel, J., and Dou, Q.P. (2019). Proteasome-associated cysteine deubiquitinases are molecular targets of environmental optical brightener compounds. *J. Cell. Biochem.* 120, 14065–14075.
56. D'Arcy, P., Brnjic, S., Olofsson, M.H., Fryknäs, M., Lindsten, K., De Cesare, M., Perego, P., Sadeghi, B., Hassan, M., Larsson, R., and Linder, S. (2011). Inhibition of proteasome deubiquitinating activity as a new cancer therapy. *Nat. Med.* 17, 1636–1640.
57. Chen, K., Qian, W., Jiang, Z., Cheng, L., Li, J., Sun, L., Zhou, C., Gao, L., Lei, M., Yan, B., et al. (2017). Metformin suppresses cancer initiation and progression in genetic mouse models of pancreatic cancer. *Mol. Cancer* 16, 131.
58. Xia, X., Huang, C., Liao, Y., Liu, Y., He, J., Guo, Z., Jiang, L., Wang, X., Liu, J., and Huang, H. (2019). Inhibition of USP14 enhances the sensitivity of breast cancer to enzalutamide. *J. Exp. Clin. Cancer Res.* 38, 220.
59. Perales-Puchalt, A., Wojtak, K., Duperret, E.K., Yang, X., Slager, A.M., Yan, J., Muthumani, K., Montaner, L.J., and Weiner, D.B. (2019). Engineered DNA Vaccination against Follicle-Stimulating Hormone Receptor Delays Ovarian Cancer Progression in Animal Models. *Mol. Ther.* 27, 314–325.
60. Jinadasa, R., Balmus, G., Gerwitz, L., Roden, J., Weiss, R., and Duhamel, G. (2011). Derivation of thymic lymphoma T-cell lines from *Atm*<sup>-/-</sup> and *p53*<sup>-/-</sup> mice. *J. Vis. Exp.* 50, 2598.
61. Ma, O., Cai, W.W., Zender, L., Dayaram, T., Shen, J., Herron, A.J., Lowe, S.W., Man, T.K., Lau, C.C., and Donehower, L.A. (2009). MMP13, Birc2 (cIAP1), and Birc3 (cIAP2), amplified on chromosome 9, collaborate with p53 deficiency in mouse osteosarcoma progression. *Cancer Res.* 69, 2559–2567.

62. Ma, Y.S., Yu, F., Zhong, X.M., Lu, G.X., Cong, X.L., Xue, S.B., Xie, W.T., Hou, L.K., Pang, L.J., Wu, W., et al. (2018). miR-30 Family Reduction Maintains Self-Renewal and Promotes Tumorigenesis in NSCLC-Initiating Cells by Targeting Oncogene TM4SF1. *Mol. Ther.* *26*, 2751–2765.
63. Ma, Y.S., Lv, Z.W., Yu, F., Chang, Z.Y., Cong, X.L., Zhong, X.M., Lu, G.X., Zhu, J., and Fu, D. (2018). MicroRNA-302a/d inhibits the self-renewal capability and cell cycle entry of liver cancer stem cells by targeting the E2F7/AKT axis. *J. Exp. Clin. Cancer Res.* *37*, 252.
64. Ma, Y.S., Wu, Z.J., Zhang, H.W., Cai, B., Huang, T., Long, H.D., Xu, H., Zhao, Y.Z., Yin, Y.Z., Xue, S.B., et al. (2019). Dual regulatory mechanisms of expression and mutation involving metabolism-related genes FDFT1 and UQCR5 during CLM. *Mol. Ther. Oncolytics* *14*, 172–178.
65. Jin, F., Yang, R., Wei, Y., Wang, D., Zhu, Y., Wang, X., Lu, Y., Wang, Y., Zen, K., and Li, L. (2019). HIF-1 $\alpha$ -induced miR-23a~27a~24 cluster promotes colorectal cancer progression via reprogramming metabolism. *Cancer Lett.* *440-441*, 211–222.
66. Simon, T., Pinioti, S., Schellenberger, P., Rajeev, V., Wendler, F., Cutillas, P.R., King, A., Stebbing, J., and Giamas, G. (2018). Shedding of bevacizumab in tumour cells-derived extracellular vesicles as a new therapeutic escape mechanism in glioblastoma. *Mol. Cancer* *17*, 132.

## Supplemental Information

### Inhibition of USP14 Deubiquitinating

### Activity as a Potential Therapy

### for Tumors with *p53* Deficiency

Yu-Shui Ma, Xiao-Feng Wang, Yun-Jie Zhang, Pei Luo, Hui-Deng Long, Liu Li, Hui-Qiong Yang, Ru-Ting Xie, Cheng-You Jia, Gai-Xia Lu, Zheng-Yan Chang, Jia-Jia Zhang, Shao-Bo Xue, Zhong-Wei Lv, Fei Yu, Qing Xia, and Da Fu



1 **SUPPLEMENTAL INFORMATION**

2

3 **Inhibition of USP14 deubiquitinating activity as a potential therapy for tumors**  
4 **with *p53* deficiency**

5

6 Yu-Shui Ma<sup>1,2\*</sup>, Xiao-Feng Wang<sup>3\*</sup>, Yun-Jie Zhang<sup>3</sup>, Pei Luo<sup>1</sup>, Hui-Deng Long<sup>1</sup>, Liu  
7 Li<sup>1</sup>, Hui-Qiong Yang<sup>1</sup>, Ru-Ting Xie<sup>1</sup>, Cheng-You Jia<sup>2</sup>, Gai-Xia Lu<sup>2</sup>, Zheng-Yan  
8 Chang<sup>1</sup>, Jia-Jia Zhang<sup>2</sup>, Shao-Bo Xue<sup>1</sup>, Zhong-Wei Lv<sup>2</sup>, Fei Yu<sup>2</sup>, Qing Xia<sup>3</sup>, Da Fu<sup>1#</sup>

9

10 Supplemental information contains 3 supplemental figures and legends and online  
11 methods.

12

13 **Supplementary Figure 1**

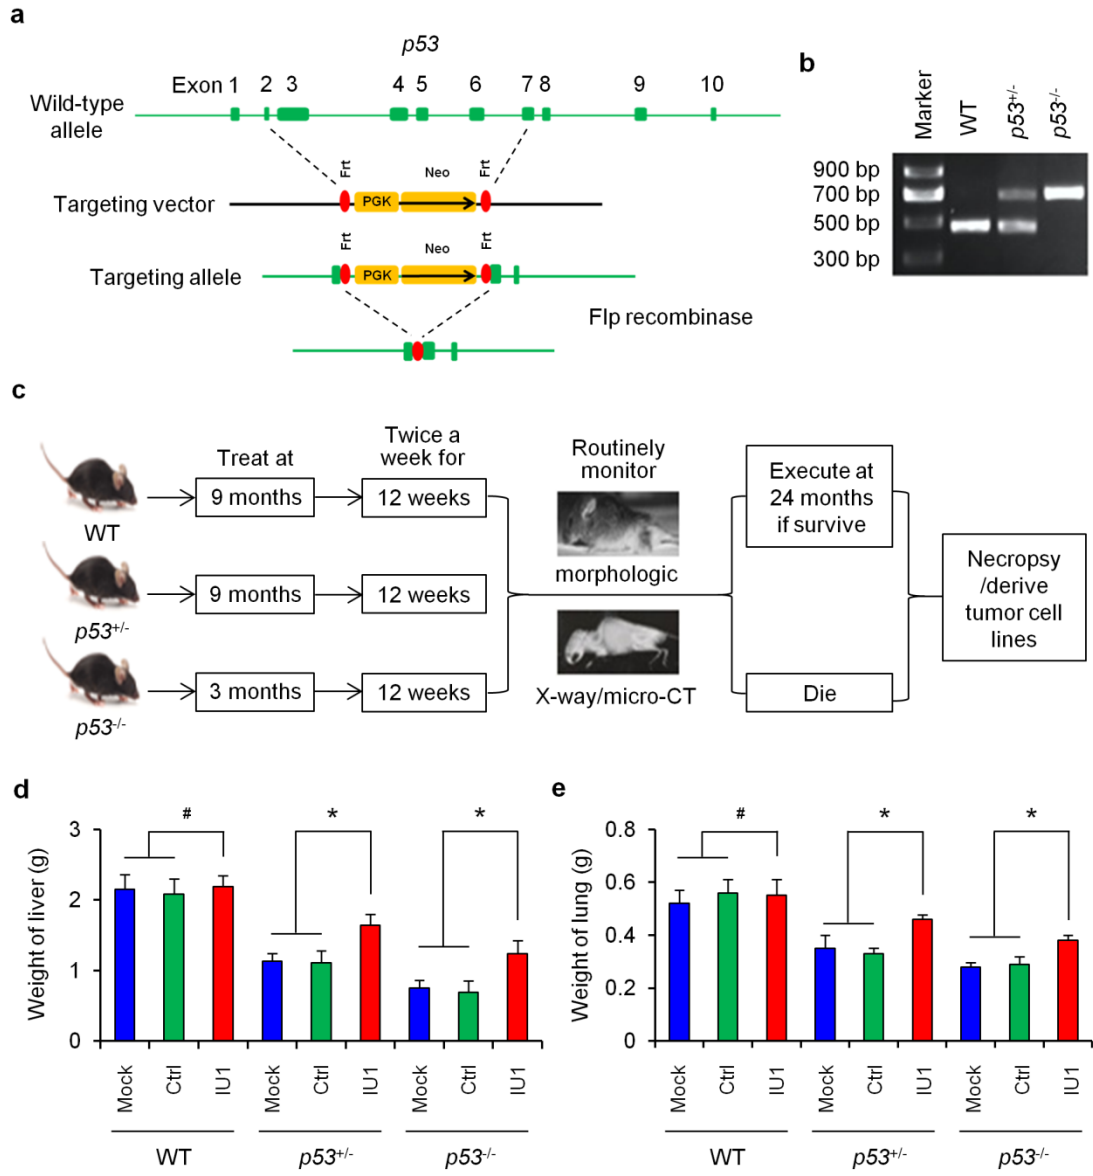

14

15

16 **Supplementary Figure 2**

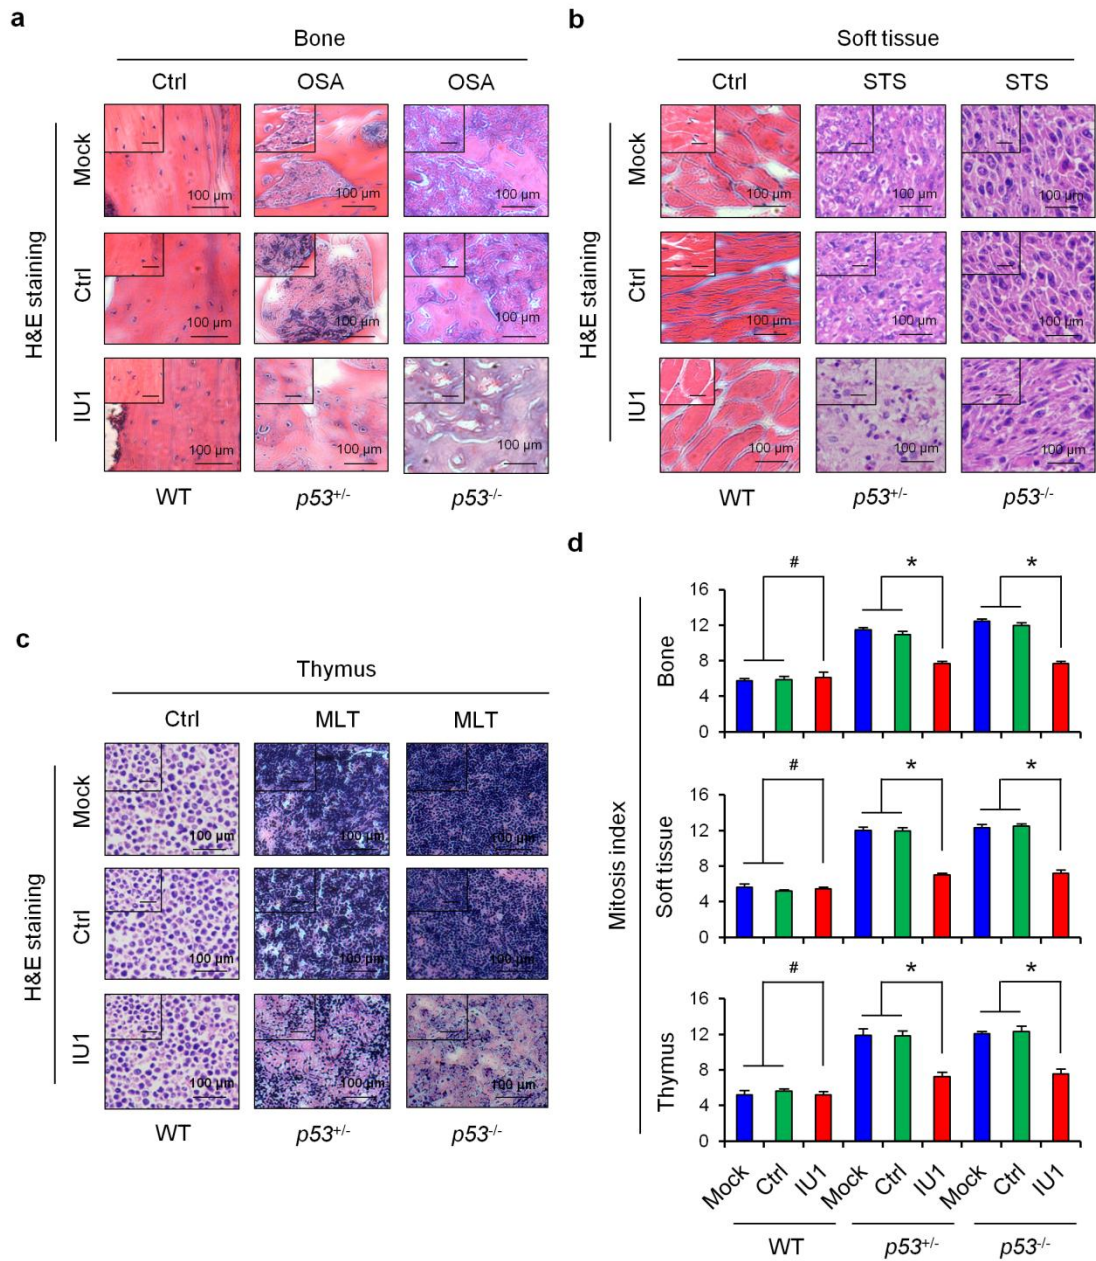

17

18

19 **Supplementary Figure 3**

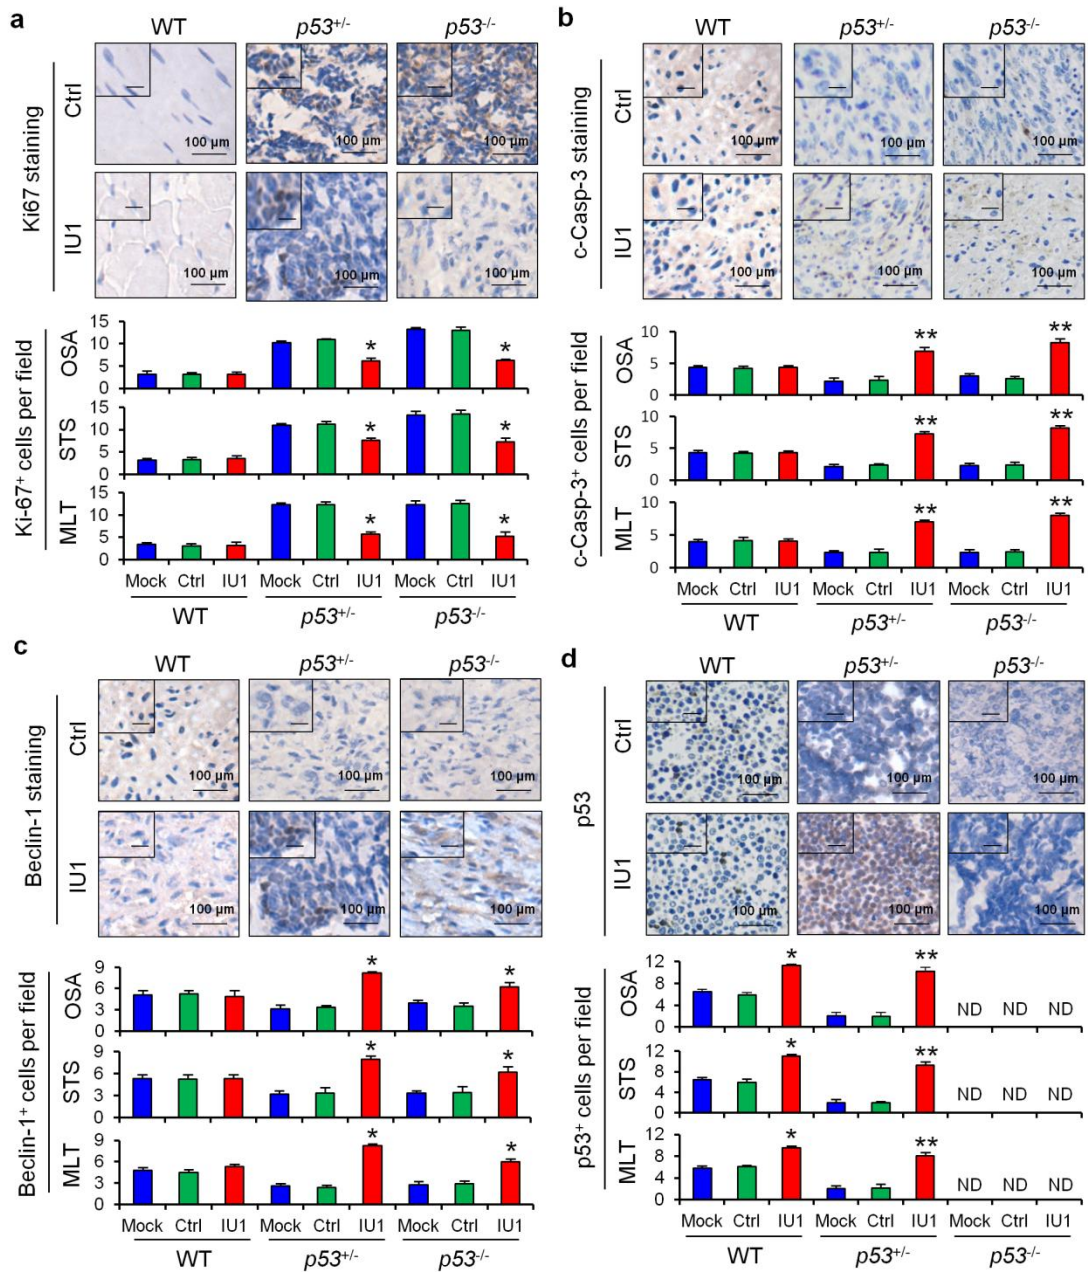

20

21



22 **Supplementary legends**

23 **Supplementary Figure 1. p53 gene targeting and treatment with IU1 and b-AP15.**

24 (a) Scheme for generation of primary tumors with Flp recombinase in FRT-flanked  
25 *p53* mice. Homologous recombination between the p53KO-targeting vector and one  
26 allele of the endogenous p53 gene results in the replacement of p53 coding sequences  
27 between exons 2 and 7 with the neo gene expression cassette and the formation of the  
28 *p53*<sup>Δ</sup> mutant allele. (b) Genotypic analysis of offspring from a *p53* heterozygous cross.  
29 Tail biopsies were collected at weaning and offspring were screened for the *p53*  
30 mutation. (c) Experimental design of generation of primary tumors and treatment with  
31 IU1 for tumors with *p53* deficiency. (d, e) Responses to treatment with IU1 as  
32 assessed by weight of liver (d) and lung (e). Data shown are the means ± SDs.  
33 Statistical analyses were performed with one-way ANOVA (\*  $P < 0.05$  and #  $P > 0.05$   
34 vs. control).

35 **Supplementary Figure 2. H&E staining and mitosis index analysis in WT or**

36 ***p53*-deficient mice.** (a-c) H&E staining analysis of normal or primary tumors in bone  
37 (a), soft tissue (b) and thymus (c) in WT or *p53*-deficient mice with or without  
38 treatment with IU1. (d) The mitosis index analysis in WT or *p53*-deficient mice with  
39 or without treatment with IU1. Data shown are the means ± SDs. Statistical analyses  
40 were performed with one-way ANOVA (\*\*  $P < 0.01$  and #  $P > 0.05$  vs. control).

41 **Supplementary Figure 3. IHC staining analysis for p53, Ki67, c-caspase-3 and**

42 **Beclin-1 in WT or *p53*-deficient mice.** IHC staining analysis and quantitative  
43 analysis for p53 (a), Ki67 (b), c-caspase-3 (c) and Beclin-1 (d) in WT or *p53*-deficient

44 mice with or without treatment with IU1 and b-AP15. Data shown are the means  $\pm$   
45 SDs. Statistical analyses were performed with one-way ANOVA (\*  $P < 0.05$  and \*\*  $P$   
46  $< 0.01$  vs. control). Ctrl, control; MLT, malignant lymphomas of thymus; Mock, mice  
47 without treatment; OSA, osteosarcoma; STS, soft tissue sarcoma; WT, wild type.  
48

49 **ONLINE METHODS**

50 **Animal models and genotyping**

51 All experimental procedures were approved by the Institutional Animal Care and  
52 Use Committee (IACUC) guidelines at Tongji University School of Medicine  
53 (SYDW-19-215).

54 The  $p53^{-/-}$  mice in C57BL/6 background, purchased from Jackson Laboratory, were  
55 crossed with WT mice and the resulting mice were further intercrossed to generate  
56  $p53^{+/-}$  mice [1]. Genomic DNA from tail biopsies was genotyped by PCR. The  $p53^{+/-}$   
57 mice and  $p53^{-/-}$  mice were used to observe the spontaneous tumor formation,  
58 treatment of IU1 and primary cell cultures. IU1 (5mg/kg, 1%DMSO + 30%PEG300 +  
59 1%Tween80 + ddH<sub>2</sub>O) was given i.p. twice a week for the number of days indicated.  
60 IU1 was purchased from SelleckChem. Mice without any treatment were used as the  
61 mock, and mice treated with vehicle (1%DMSO + 30%PEG300 + 1%Tween80 +  
62 ddH<sub>2</sub>O) were used as the control.

63 All mice were monitored by X-ray, MRI or micro-CT diagnosis for tumor  
64 phenotypes weekly up to the age of 24 months before all of the surviving animals  
65 were sacrificed. The body and main organs (liver and lung) weight measurements  
66 were performed to collect the data when the mouse was died or up to the age of 24  
67 months before all of the surviving animals were sacrificed. Moribund animals or those  
68 mice developing obvious tumors before this end point were also sacrificed and  
69 necropsied. The tumors were placed in 10% neutral buffered formalin for further  
70 histopathological analysis. Tumor histological type was independently confirmed by

71 two experienced pathologists and tumor volume was calculated using the following  
72 formula: volume = length × width<sup>2</sup> × 0.52.

73 All cell mitotic figures within each tumor were counted and are presented as  
74 number of mitotic figures per unit area (cm<sup>2</sup>). All experimental procedures were  
75 approved by the Institutional Animal Care and Use Committee (IACUC) guidelines at  
76 Tongji University School of Medicine (SYDW-19-215).

### 77 **Cell lines**

78 Human osteosarcoma epithelial cell lines U2OS, mouse B lymphoma cell  
79 WEH1-231 and human HEK293T cell lines were purchased from the Cell Bank of the  
80 Chinese Academy of Sciences (Shanghai, China), and cultured in DMEM media  
81 (Invitrogen, Carlsbad, USA) and supplemented with 10 % (v/v) fetal bovine serum  
82 (FBS), 100 U/ml penicillin, and 100 mg/ml streptomycin. Cell lines were routinely  
83 tested for mycoplasma contamination, and have been authenticated with short-tandem  
84 repeat analysis. Derivation of murine thymic lymphoma T-cell lines and primary  
85 cultured osteosarcoma cells lines were obtained from *p53*<sup>-/-</sup> mice and cultured as  
86 described previously [2, 3]. Cell culture was conducted at 37 °C in a humidified 5%  
87 CO<sub>2</sub> incubator.

### 88 **Cell viability assay**

89 MTS assay (CellTiter 96 Aqueous One Solution reagent) was used to test cell  
90 viability as we previously reported [4]. In brief, exponentially growing cells were  
91 seeded at 2500 cells/well in a 96-well plate. After incubation for 24 h, U2OS,  
92 WEH1-231, PCOC or MTLTC cells were treated with IU1, USP14, shUSP14, COPS5



93 and/or shCOPS5 plasmids, followed by continuous incubation for 24, 48 or 72 h.  
94 MTS reagent (20  $\mu$ l) was directly added to each well and the incubation was  
95 continued for additional 3 h. The absorbance of optical density was measured with a  
96 microplate reader (Sunrise, Tecan, Mannedorf, Switzerland) at wavelength 490 nm.  
97 Cell viability was calculated by the following formula: cell viability (%) = (average  
98 absorbance of treated group – average absorbance of blank) / (average absorbance of  
99 untreated group – average absorbance of blank)  $\times$  100%.

#### 100 **Flow cytometry (FCM) analysis**

101 Cell apoptosis was determined by flow cytometry analysis [5]. Cells were collected,  
102 washed with cold phosphate-buffered saline, fixed in cold 70% ethanol, treated with  
103 DNase-free RNase (100  $\mu$ g/mL, Cat. No. RB473; Sangon Biotech Co., Ltd., Shanghai,  
104 China), and stained with 50  $\mu$ g/mL propidium iodide (Cat. No. P1112; Sangon  
105 Biotech) and the Annexin V-APC/7-AAD Kit (Cat. KGA-1025; KeyGEN Biotech,  
106 Nanjing, China). The cells were analysed using a Gallios flow cytometer (Beckman  
107 Coulter) to quantify the proportion of cells in apoptosis status. To analyze the cell  
108 cycle distribution, cells were treated with IU1 for the previously indicated time  
109 periods and the harvested cells were fixed with 75% ethanol overnight. Next, the cells  
110 were incubated with a 500  $\mu$ L hypotonic solution containing 50  $\mu$ g/mL PI, 0.1%  
111 sodium citrate, and 0.1% Triton X-100 for 15 min in the dark, and then analyzed by  
112 FCM (Becton Dickinson, USA). Data were analyzed using Modfit 2.8 software [6].

#### 113 **Plasmid construction and transfection**

114 Overexpression of USP14, Flag-USP14, COPS5 or HA-COPS5 was performed

115 using the pMSCV retroviral plasmid. All constructs were confirmed by PCR and  
116 Sanger sequencing. The plasmids were transiently transfected into target cells with  
117 Lipofectamin 2000 (Life Technologies, Gaithersburg, MD).

118 To generate stable cell lines with specific gene overexpression or knockdown, the  
119 plasmids were packaged into retroviruses with the amphotropic Phoenix packaging  
120 cell line and infected into target cells, followed by puromycin/hygromycin selection  
121 of infected cells. USP14 or COPS5-knockdown cell lines were generated using short  
122 hairpin RNAs and retroviral transduction. Short hairpinRNA (shRNA) a random  
123 sequence was set up as a control.

#### 124 **Western blot**

125 Total proteins were extracted from cells following the standard protocol [7]. Protein  
126 concentration was measured using the BCA protein assay kit (Thermo Scientific;  
127 23225). The primary antibodies used in this study were as follows: GAPDH (cat.  
128 ab8245), USP14 (cat. ab137432), COPS5 (cat. ab210538), p27 (cat. ab32034), DcR2  
129 (cat. ab2019), CDC25C (cat. ab32444), CDC2 (cat. ab18), cleaved caspase-3 (cat.  
130 ab2302), pro-caspase-3 (cat. ab13585), BAX (cat. ab32503), BCL-2 (cat. ab32124),  
131 Cyclin E1 (cat. ab33911), E2F7 (cat. ab56022), p15 (cat. ab53034), PARP1 (cat.  
132 ab32064), HA (cat. ab18181), Cyclin B1 (cat. ab72) and p53 (cat. ab26) from Abcam,  
133 AP-1 (cat. 9165), p21 (cat. 2947), p16 (cat. 92803) and Beclin-1 (cat. 3495) from Cell  
134 Signaling and Cyclin D1 (cat. 554181) from BD. The goat anti-rabbit IgG (Merck)  
135 and goat anti-mouse IgG (Merck) antibodies were used for western blot analyses.  
136 Antibody dilutions were 1:1,000 for primary antibodies and 1:5,000 for secondary

137 antibodies in western blotting. Data are representation of 3-4 independent  
138 experiments.

### 139 **Histology and immunohistochemistry (IHC) analysis**

140 Standard IHC and H&E staining were used to evaluate protein expression levels in  
141 tumor samples. Tissues from mice were flushed and fixed in 4% formaldehyde in PBS  
142 for 24 h. Samples were then dehydrated and embedded in paraffin, sectioned at 5  $\mu$ M  
143 and processed for H&E staining. The primary antibodies were: Ki-67 (Abcam,  
144 ab156956), Beclin-1 (Abcam, ab62557), p53 (Abcam, ab1101), COPS5 (Abcam,  
145 ab12323), USP14 (Cell Signaling, 11931), and cleaved-caspase3 (Cell Signaling,  
146 9661). Staining was visualized with ABC Kit Vectastain Elite (Vector) or TSA kit  
147 (Invitrogen). Serial sections were stained in parallel with the primary antibody  
148 replaced by PBS as controls.

### 149 **Immunoprecipitation and immunoblotting**

150 For immunoprecipitation assays, cells were pretreated MG132 or IU1 for the  
151 previously indicated time periods, and lysed with HEPES lysis buffer (20 mM HEPES,  
152 pH 7.2, 50 mM NaCl, 0.5% NP-40, 1 mM NaF and 1 mM dithiothreitol)  
153 supplemented with protease-inhibitor cocktail (Roche). Immunoprecipitations were  
154 performed using the indicated primary antibody and protein A/G agarose beads  
155 (Roche) at 4 °C. Both lysates and immunoprecipitates were examined using anti-Ub,  
156 anti-Flag or anti-HA primary antibodies (Cell Signaling) and the related secondary  
157 antibody followed by detection with the chemiluminescence substrate (Millipore). For  
158 immunoblotting, total proteins were extracted from cells following the standard

159 protocol. Cytomembrane free lysate were separated from cells by Native Membrane  
160 Protein Extraction Kit (Millipore; 444810). Nuclear and cytoplasmic proteins were  
161 separated by Cytoplasmic & Nuclear Extraction Kit (Invent; sc-003) [8]. Protein  
162 concentration was measured using the BCA protein assay kit (Thermo Scientific;  
163 23225).

#### 164 **Mass spectrometry**

165 Pellets of U2OS cell expressing Flag-UCH37 from two 150-mm plates were lysed  
166 in 50 mM HEPES-KOH (pH8.0), 100 mM KCl, 2 mM EDTA, 0.1% NP-40, 10%  
167 glycerol and affinity-purified using Flag-M2 magnetic beads (Sigma-Aldrich).  
168 Subsequently, digestion with trypsin (Worthington, Columbus) was performed  
169 on-beads. For liquid chromatography-tandem mass spectrometry analysis, peptides  
170 were reconstituted in 5% formic acid and loaded onto a 12–15-cm fused silica column  
171 with pulled tip packed with C18 reversed-phase material. Peptides were analysed  
172 using an LTQ-Orbitrap Velos (Thermo Scientific) or a 6600 Triple TOF (AB SCIEX,  
173 Framingham) coupled to an Eksigent NanoLC-Ultra HPLC system and a  
174 nano-electrospray ion source (Proxeon Biosystems, Thermo Fisher Scientific).  
175 Peptides were eluted from the column using a 90–100-min gradient of acetonitrile in  
176 0.1% formic acid. The lyophilized peptide mixture was re-suspended in water with  
177 0.1% formic acid (v/v) and its content was estimated by UV light spectral density at  
178 280 nm, then 3 µg of the digest peptides were analyzed by nano-liquid  
179 chromatography-tandem mass spectrometry (LC-MS/MS) on LTQ Orbitrap Velos Pro  
180 mass spectrometer [9-11]. Raw data was processed by Maxquant software (1.3) and

181 then used for database and spectral library searching using Andromeda peptide search  
182 engines. The Maxquant peptide and protein quantification results files were imported  
183 into Perseus software (version 1.5.1.6) for further analysis [12].

#### 184 **RNA extraction and quantitative PCR (qPCR)**

185 RNA was extracted using TRIzol (ThermoFisher Scientific) following the  
186 manufacture's protocol, and then subjected to cDNA synthesis using iScript kit  
187 (Bio-rad). RNA concentration was measured using a NanoDrop2000  
188 spectrophotometer (Thermo Fisher Scientific, Waltham, MA, USA). Electrophoresis  
189 on 1.5% denaturing agarose gels was performed to evaluate the quality of all RNA  
190 specimens. The cDNA was obtained from total RNA by reverse transcription, and the  
191 final RNA concentration used in the quantitative PCR reaction was 10 ng, Real-time  
192 PCR was performed using the iTag universal SYBR Green kit (Bio-rad) and  
193 subsequently analyzed in a CFX Connect system (Bio-rad). Sequences of PCR  
194 primers are as following: GAPDH: Forward, 5'-ACCCAGAAGACTGTGGATGG-3',  
195 Reverse, 5'-TTCTAGACGGCAGGTCAGGT-3'; USP14: Forward,  
196 5'-GGCGTGTGGAGATGTATAAC-3, Reverse,  
197 5'-CAGCTCAGCACTATCCAGAC-3' and COPS5, Forward,  
198 5'-GTCATGTGGTTGCTGTGATG-3', Reverse,  
199 5'-AGGTGACGTGACTGAATGAG-3'. GAPDH were used as the endogenous  
200 controls, and the  $2^{-\Delta\Delta CT}$  method was used to analyze expression levels [13].

#### 201 **Imaging**

202 In the animal studies, we used the dual tube/detector micro-CT system that has

203 been described in detail elsewhere [14]. The x-ray parameters were 80 kVp, 160 mA,  
204 and 10ms per exposure, and the radiation dose associated with the micro-CT scan was  
205 16 cGy. MRI experiments were performed on a Bruker BioSpec 7.0 Tesla 30 cm clear  
206 bore USR (Ultra Shielded Refrigerated) horizontal bore Superconducting Magnet  
207 System [15]. The Bruker-made 23-mm ID birdcage volume radiofrequency coil was  
208 used for both radiofrequency excitation and receiving. Animals were anesthetized  
209 throughout the imaging procedure through the inhalation of a mixture of 1.5%  
210 isoflurane into medically supplied air.

### 211 **Statistical analysis**

212 Measurement data was expressed as mean  $\pm$  S.D. (standard deviation). Categorical  
213 data were reported as numbers and percentages. Analysis of two samples was  
214 performed with unpaired two-tailed Student t test for equal variance, or t test with  
215 Welch's correction for heterogeneity of variance. The chi-square test was used to  
216 evaluate the difference among different groups. Univariate survival analysis of overall  
217 survival was carried out using the Kaplan-Meier method. Spearman's correlation  
218 coefficient was used to test the relationship of two independent groups. All  
219 calculations were performed with the Prism 6.0 GraphPad or SPSS 20.0 software  
220 program (SPSS Inc, Chicago, IL, USA). The level of significance was set as  $P < 0.05$ .

221



222 **Supplementary References**

- 223 [1] Jacks T, Remington L, Williams BO, Schmitt EM, Halachmi S, Bronson RT, *et*  
224 *al.* Tumor spectrum analysis in p53-mutant mice. *Curr Biol.* 1994, 4(1): 1-7.
- 225 [2] Jinadasa R, Balmus G, Gerwitz L, Roden J, Weiss R, Duhamel G. Derivation of  
226 thymic lymphoma T-cell lines from *Atm*<sup>-/-</sup> and *p53*<sup>-/-</sup> mice. *J Vis Exp.* 2011,  
227 (50): 2598.
- 228 [3] Ma O, Cai WW, Zender L, Dayaram T, Shen J, Herron AJ, *et al.* MMP13, Birc2  
229 (cIAP1), and Birc3 (cIAP2), amplified on chromosome 9, collaborate with p53  
230 deficiency in mouse osteosarcoma progression. *Cancer Res.* 2009, 69(6):  
231 2559-67.
- 232 [4] Liao Y, Liu N, Hua X, Cai J, Xia X, Wang X, *et al.* Proteasome-associated  
233 deubiquitinase ubiquitin-specific protease 14 regulates prostate cancer  
234 proliferation by deubiquitinating and stabilizing androgen receptor. *Cell Death*  
235 *Dis.* 2017, 8(2): e2585.
- 236 [5] Ma YS, Yu F, Zhong XM, Lu GX, Cong XL, Xue SB, *et al.* miR-30 Family  
237 Reduction Maintains Self-Renewal and Promotes Tumorigenesis in  
238 NSCLC-Initiating Cells by Targeting Oncogene TM4SF1. *Mol Ther.* 2018,  
239 S1525-0016(18): 30447-7.
- 240 [6] Ma YS, Huang T, Zhong XM, Zhang HW, Cong XL, Xu H, *et al.* Proteogenomic  
241 characterization and comprehensive integrative genomic analysis of human  
242 colorectal cancer liver metastasis. *Mol Cancer.* 2018, 17(1): 139.
- 243 [7] Ma YS, Lv ZW, Yu F, Chang ZY, Cong XL, Zhong XM, *et al.* MiRNA-302a/d

244 inhibits the self-renewal capability and cell cycle entry of liver cancer stem cells  
245 by targeting the E2F7/AKT axis. *J Exp Clin Cancer Res.* 2018, 37(1): 252.

246 [8] Choi YS, Hoon Jeong J, Min HK, Jung HJ, Hwang D, Lee SW, *et al.* Shot-gun  
247 proteomic analysis of mitochondrial D-loop DNA binding proteins: identification  
248 of mitochondrial histones. *Mol Biosyst.* 2011, 7(5): 1523-36.

249 [9] Yu Z, Liu N, Wang Y, Li X, Wang X. Identification of neuroglobin-interacting  
250 proteins using yeast two-hybrid screening. *Neuroscience.* 2012, 200: 99-105.

251 [10] Tian XP, Jin XH, Li M, Huang WJ, Xie D, Zhang JX. The depletion of PinX1  
252 involved in the tumorigenesis of non-small cell lung cancer promotes cell  
253 proliferation via p15/cyclin D1 pathway. *Mol Cancer.* 2017, 16(1): 74.

254 [11] Luo P, Lu G, Fan LL, Zhong X, Yang H, Xie R, *et al.* Dysregulation of  
255 TMPRSS3 and TNFRSF11B correlates with tumorigenesis and poor prognosis in  
256 patients with breast cancer. *Oncol Rep.* 2017, 37(4): 2057-2062.

257 [12] Sun X, Zhang H, Luo L, Zhong K, Ma Y, Fan L, *et al.* Comparative proteomic  
258 profiling identifies potential prognostic factors for human clear cell renal cell  
259 carcinoma. *Oncol Rep.* 2016, 36(6): 3131-3138.

260 [13] Livak KJ, Schmittgen TD. Analysis of relative gene expression data using  
261 real-time quantitative PCR and the  $2^{-\Delta\Delta Ct}$  method. *Methods*, 2001. 25(4):  
262 402-408.

263 [14] Badea CT, Johnston S, Johnson B, Lin M, Hedlund LW, Johnson GA. A dual  
264 micro-CT system for small animal imaging. *Proc SPIE.* 2018, 6913: 691342.

265 [15] Ni J, Ramkissoon SH, Xie S, Goel S, Stover DG, Guo H, *et al.* Combination

266 inhibition of PI3K and mTORC1 yields durable remissions in orthotopic  
267 patient-derived xenografts of HER2-positive breast cancer brain metastases. Nat  
268 Med. 2016, 22(7): 723–726.
